# Supplementary material for: Distinct lncRNA transcriptional fingerprints characterize progressive stages of multiple myeloma
Source: PubMed Central journal article supplement (PMC4924754; doi:10.18632/oncotarget.7442), 2016-02-17
Supplement: oncotarget-07-14814-s001.pdf [file oncotarget-07-14814-s001.pdf]

### SUPPLEMENTARY FIGURES AND TABLES

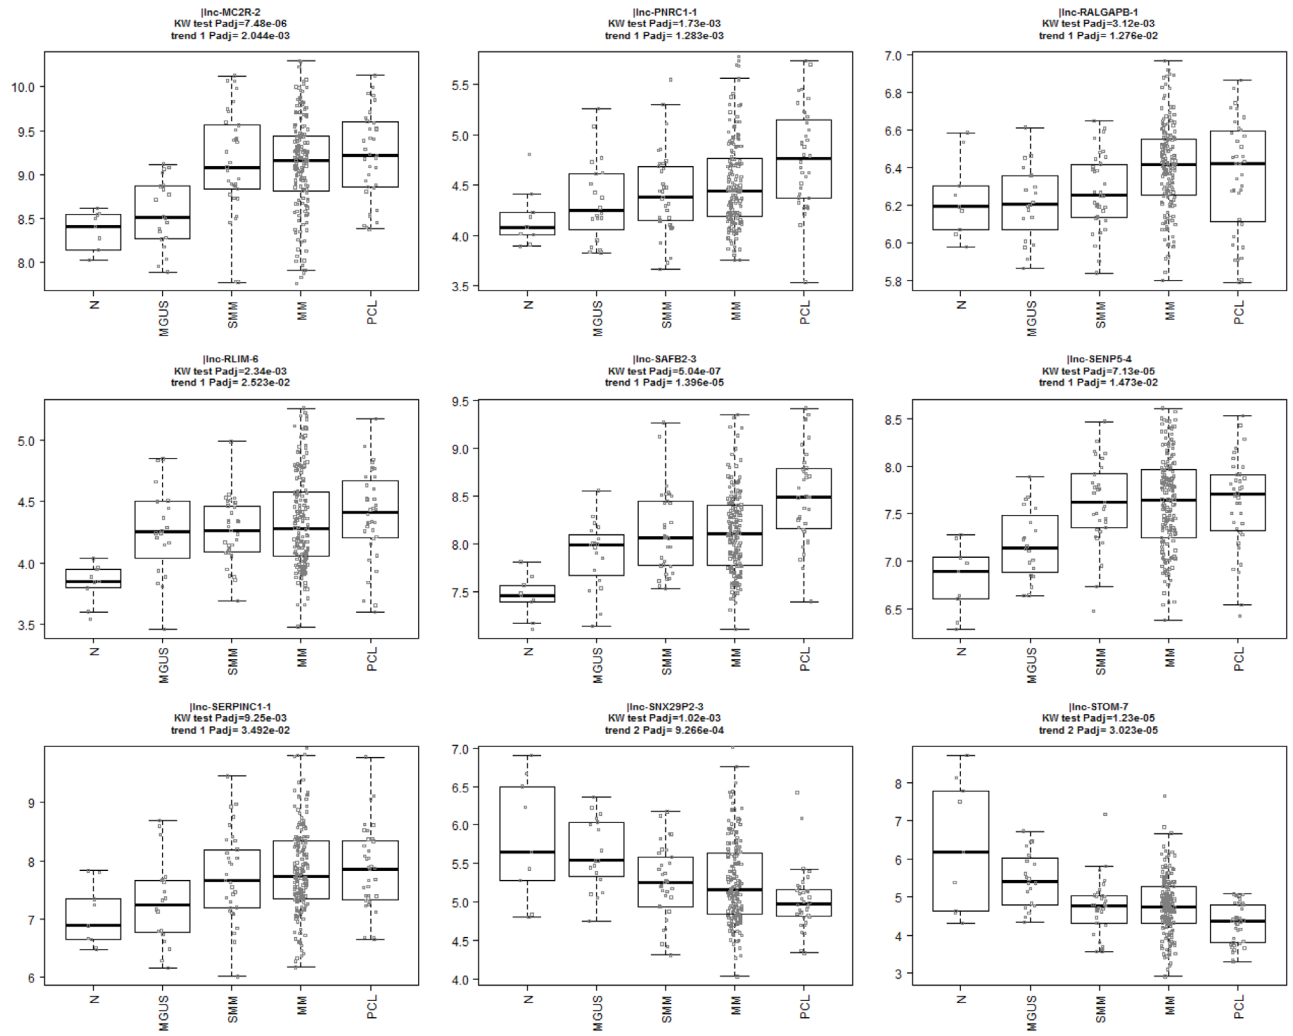

(continued)

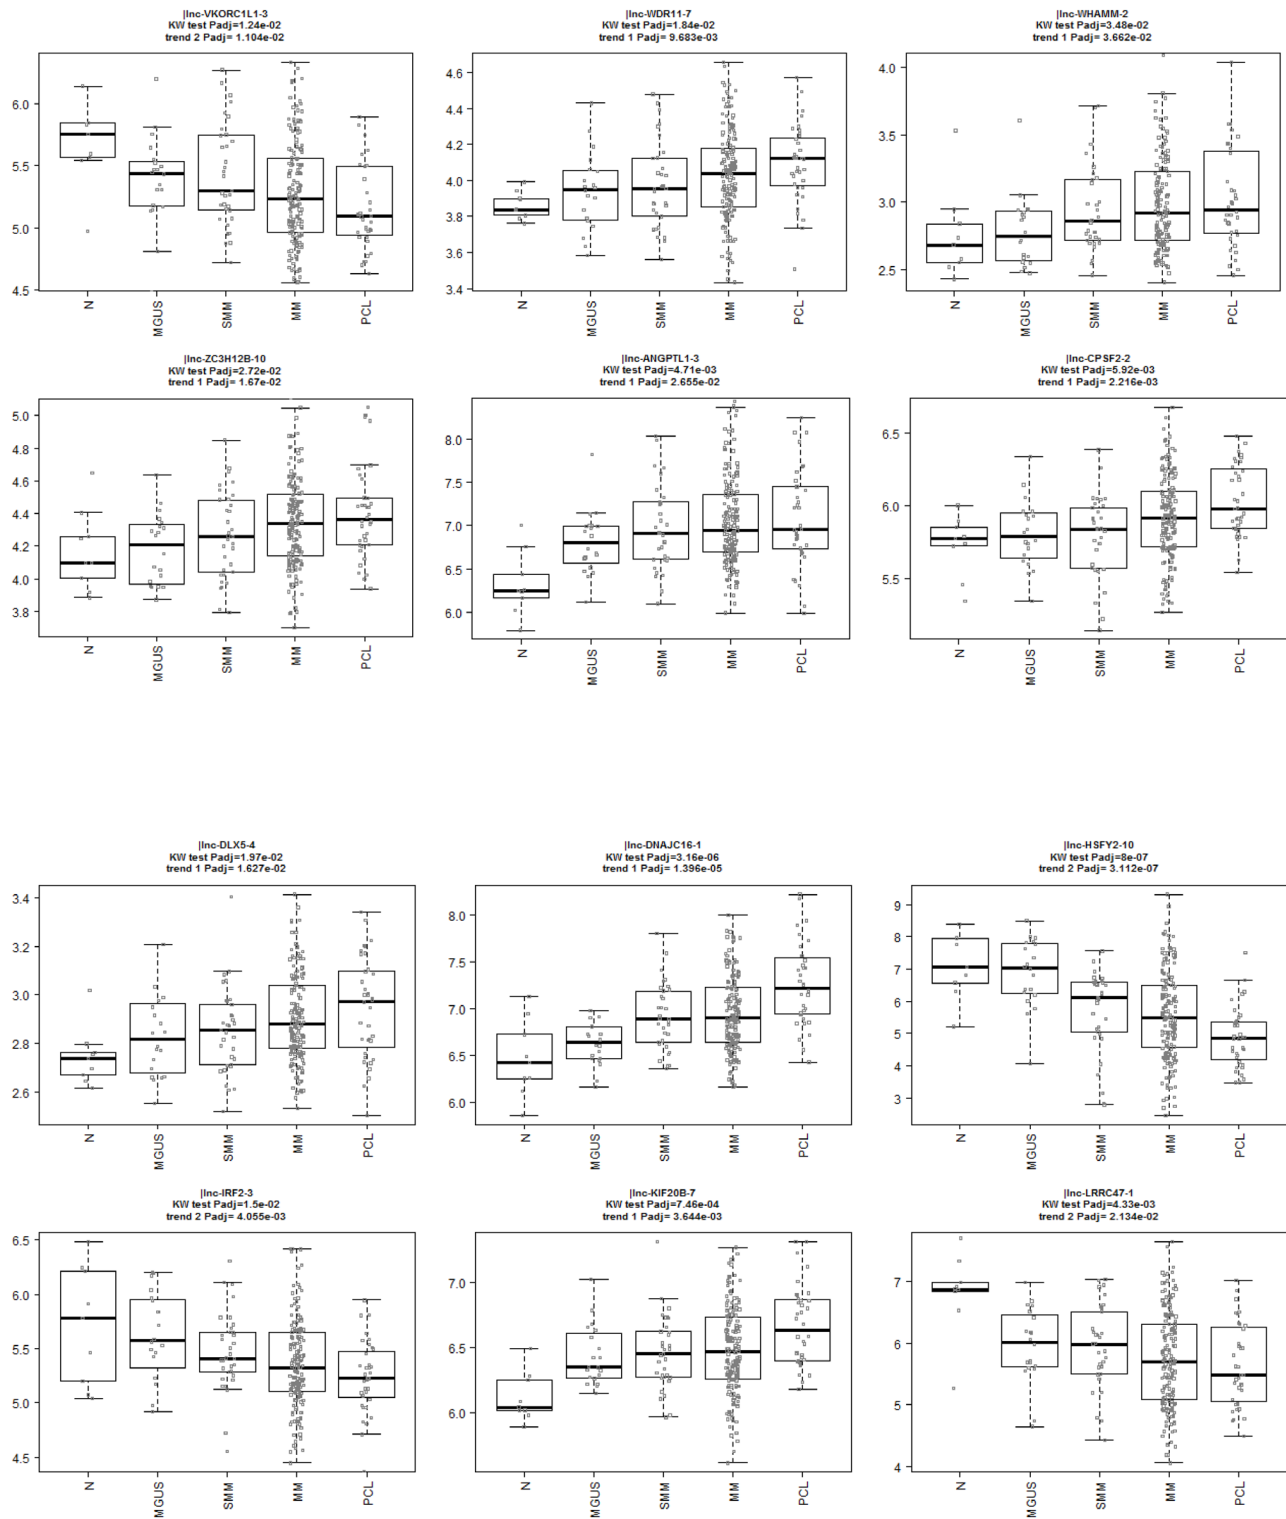

Supplementary Figure S1: Box plot of lncRNAs resulting from The Jonckheere–Terpstra test.

| lncRNA              | PAIRED t-TEST<br>E vs REC<br><i>p</i> -value |
|---------------------|----------------------------------------------|
| lnc-ANGPTL1-3       | 0.3                                          |
| <b>lnc-CPSF2-2</b>  | <b>0.027</b>                                 |
| lnc-DLX5-4          | 0.89                                         |
| lnc-DNAJC16-1       | 0.94                                         |
| lnc-HSFY2-10        | 0.8                                          |
| lnc-IRF2-3          | 0.58                                         |
| lnc-KIF20B-7        | 0.85                                         |
| <b>lnc-LRRC47-1</b> | <b>0.007</b>                                 |
| lnc-MC2R-2          | 0.98                                         |
| lnc-PNRC1-1         | 0.87                                         |
| lnc-RALGAPB-1       | 0.12                                         |
| lnc-RLIM-6          | 0.97                                         |
| lnc-SAFB2-3         | 0.92                                         |
| <b>lnc-SENP5-4</b>  | <b>0.04</b>                                  |
| lnc-SERPINC1-1      | 0.069                                        |
| lnc-SNX29P2-3       | 0.69                                         |
| lnc-STOM-7          | 0.66                                         |
| lnc-VKORC1L1-3      | 0.98                                         |
| lnc-WDR11-7         | 0.23                                         |
| lnc-WHAMM-2         | 0.99                                         |
| lnc-ZC3H12B-10      | 0.18                                         |

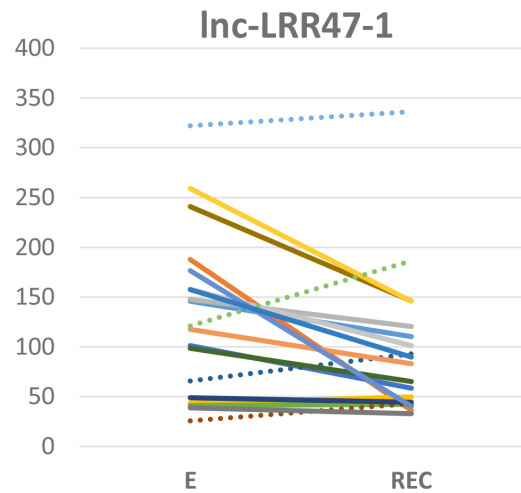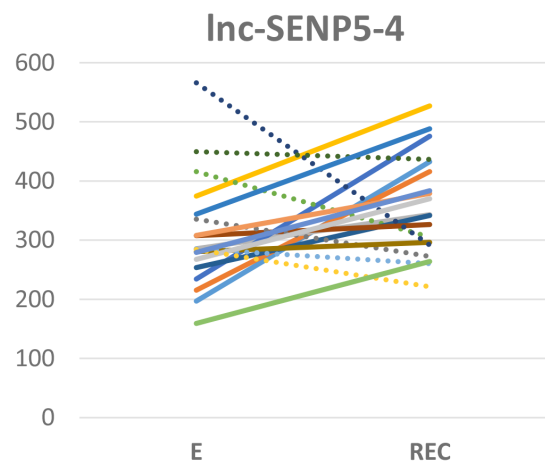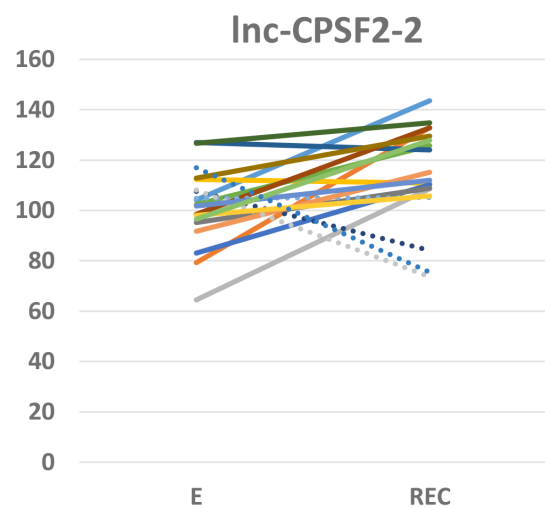

Supplementary Figure S2: Three out of 21 lncRNAs progressively increased/decreased in association with the stages of the disease are also significantly deregulated in a paired cohort of 19 MM and PCL.

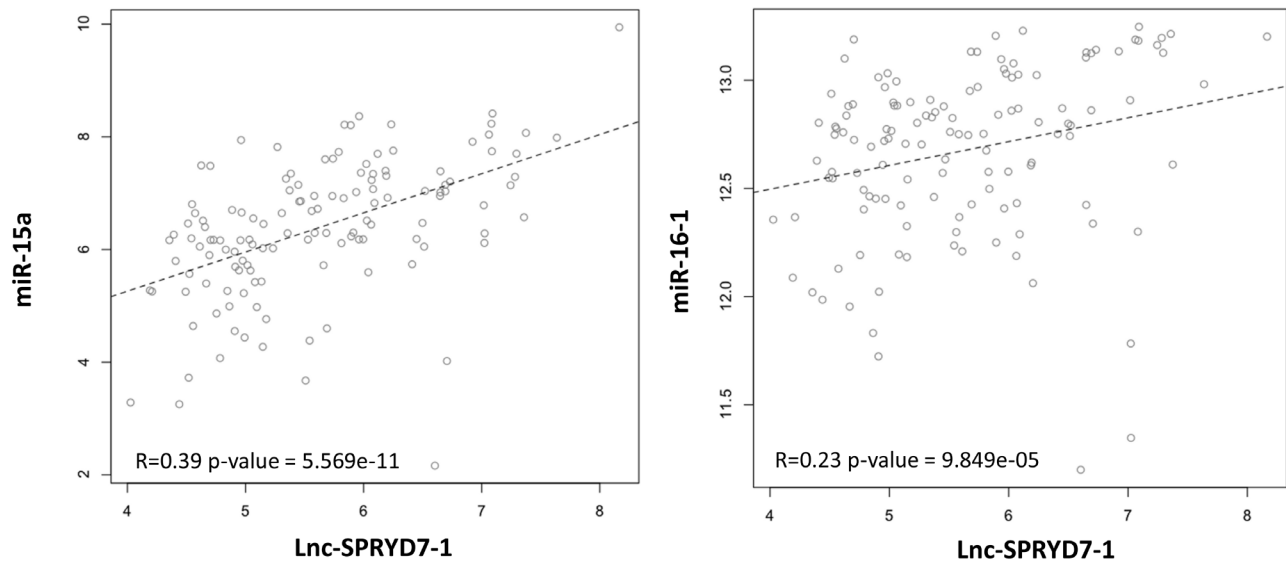

**Supplementary Figure S3: Positive Pearson’s correlation between lnc-SPRYD7-1 and miR-15a or miR-16-1 expression levels.** MiRNA expression data was available for 125 samples out of our series (GSE70254 and GSE73452) generated using GeneChip® miRNA 3.0 Array (Affymetrix Inc., Santa Clara, CA) as previously described (Calura et al 2015)

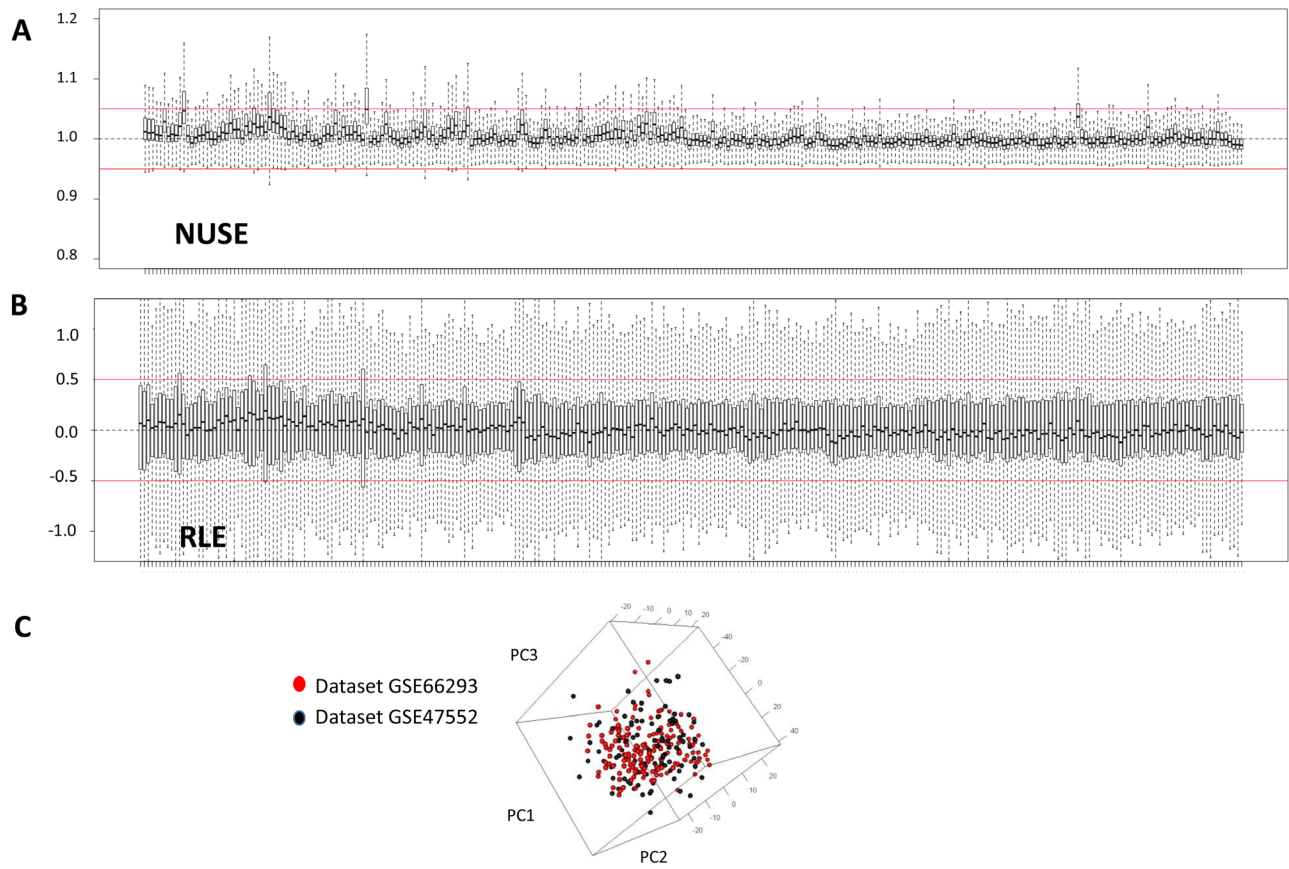

**Supplementary Figure S4: Database quality control.** A-B. Normalized unscaled standard error (NUSE) plot and relative log-expression (RLE) distribution plots. C. Principal Component analysis (PCA) plot.

**Supplementary Table S1: Modulated lncRNAs between N controls and MGUS, sMM, MM or PCL patients.**

See Supplementary File 1

**Supplementary Table S2A: Modulated lncRNAs between HD+ and HD- MM patients.**

See Supplementary File 1

**Supplementary Table S2B: Modulated lncRNAs between t(11;14)+ and t(11;14)- MM patients.**

See Supplementary File 1

**Supplementary Table S2C: Modulated lncRNAs between t(4;14)+ and t(4;14)- MM patients.**

See Supplementary File 1

**Supplementary Table S2D: Modulated lncRNAs between MAF+ and MAF-MM patients.**

See Supplementary File 1

**Supplementary Table S3: List of 518 differentially expressed genes in MALAT quartile I vs quartile IV by SAM analysis at high stringency level (median FDR=0, 90th perc FDR=0).** Genes are ordered according to SAM score, the fold change (FC) is also reported.

See Supplementary File 1

**Supplementary Table S4: List of the significantly enriched pathways for the 518 differentially expressed genes, by Toppgene suite analysis.**

See Supplementary File 1

**Supplementary Table S5: Selected gene sets significantly up- and down-regulated in MALAT1 quartile IV versus I by GSEA analysis.** Genes contributing to the core enrichment in each gene set are indicated in bold.

See Supplementary File 1

**Supplementary Table S6: Sequence-specific SYBR green qRT-PCR primers.**

See Supplementary File 1
