# Supplementary material for: Distinct lncRNA transcriptional fingerprints characterize progressive stages of multiple myeloma
Source: PubMed Central journal article supplement (PMC4924754; doi:10.18632/oncotarget.7442), 2016-02-17
Supplement: oncotarget-07-14814-s002.pdf [file oncotarget-07-14814-s002.pdf]

| N vs MGUS        |          |             | N vs sMM         |          |             | N vs MM               |          |              | N vs PCL           |          |             |
|------------------|----------|-------------|------------------|----------|-------------|-----------------------|----------|--------------|--------------------|----------|-------------|
| Gene Name        | Score(d) | Fold Change | Gene Name        | Score(d) | Fold Change | Gene Name             | Score(d) | Fold Change  | Gene Name          | Score(d) | Fold Change |
| Inc-APC-6        | 4.33     | 2.76        | Inc-APC-6        | 7.82     | 5.55        | Inc-APC-6             | 6.30     | 4.25         | Inc-APC-6          | 7.57     | 5.85        |
| Inc-MON2-2       | 4.12     | 1.68        | Inc-SCYL1-1      | 5.03     | 1.56        | Inc-TRPV2-1           | 4.17     | 2.11         | Inc-NTNG1-2        | 5.14     | 3.11        |
| Inc-ARFIP1-5     | 3.90     | 1.70        | Inc-C3orf25-2    | 4.72     | 1.66        | Inc-TARBP1-6          | 4.17     | 1.74         | Inc-SAFB2-3        | 5.03     | 2.08        |
| Inc-PTGDS-1      | 3.58     | 1.57        | Inc-TRPV2-1      | 4.20     | 2.05        | Inc-MON2-2            | 3.85     | 1.58         | Inc-ABCBS-3        | 4.92     | 2.44        |
| Inc-SNURF-1      | -5.17    | 0.29        | Inc-AP1M2-1      | 4.17     | 2.53        | Inc-AP1M2-1           | 3.80     | 2.06         | Inc-LIPG-3         | 4.86     | 4.07        |
| Inc-CISH-3       | -4.90    | 0.60        | Inc-ILSRA-11     | 4.13     | 2.04        | Inc-RYR2-5            | 3.74     | 1.89         | Inc-PAN3-2         | 4.29     | 1.63        |
| Inc-SNURF-3      | -4.57    | 0.30        | Inc-FDXACB1-2    | 4.13     | 1.67        | Inc-KIAA1755-5        | 3.73     | 2.02         | Inc-GBP2-1         | 4.17     | 3.17        |
| Inc-DIRAS2-6     | -4.50    | 0.48        | Inc-METTL8-3     | 4.09     | 2.26        | Inc-CHRD2-3           | 3.65     | 1.86         | Inc-MC2R-2         | 4.08     | 2.01        |
| Inc-ULBP3-3      | -4.49    | 0.45        | Inc-ABCBS-3      | 3.96     | 2.24        | Inc-SENP5-4           | 3.62     | 1.72         | Inc-TRPV2-1        | 4.08     | 2.05        |
| Inc-GALNT7-3     | -4.44    | 0.39        | Inc-SENP5-4      | 3.93     | 1.78        | Inc-AC090699.1.1-1    | 3.62     | 1.85         | Inc-AP1M2-1        | 4.05     | 2.24        |
| Inc-SEMA4B-4     | -4.36    | 0.62        | Inc-HNRNP1-1     | 3.88     | 2.77        | Inc-METTL8-3          | 3.55     | 1.96         | Inc-KBTBD2-2       | 3.94     | 1.88        |
| Inc-KIAA1755-3   | -4.34    | 0.40        | Inc-FOXM1-4      | 3.74     | 1.90        | Inc-FAM22E-2          | 3.55     | 2.35         | Inc-DNAJC16-1      | 3.91     | 1.73        |
| Inc-NVL-6        | -4.32    | 0.49        | Inc-PACRGL-9     | 3.68     | 1.60        | Inc-ARFIP1-5          | 3.52     | 1.80         | Inc-GCNT4-4        | 3.86     | 2.21        |
| Inc-AC100793.1-1 | -4.28    | 0.49        | Inc-LIPG-3       | 3.60     | 2.79        | Inc-ABCBS-3           | 3.51     | 1.95         | Inc-KIAA1755-5     | 3.86     | 2.33        |
| Inc-TMEM75-5     | -4.17    | 0.44        | Inc-F9-4         | 3.58     | 1.57        | Inc-AC09336.1-8       | 3.51     | 1.52         | Inc-SYNCRIP-2      | 3.86     | 2.09        |
| Inc-ADAP2-2      | -3.96    | 0.59        | Inc-MC2R-2       | 3.57     | 1.87        | Inc-CRNKL1-4          | 3.50     | 1.60         | Inc-MON2-2         | 3.75     | 1.90        |
| Inc-ANAPC7-1     | -3.85    | 0.51        | Inc-SAFB2-3      | 3.55     | 1.60        | Inc-SAFB2-3           | 3.50     | 1.60         | Inc-PAIP1-3        | 3.73     | 1.63        |
| Inc-IL17RA-4     | -3.81    | 0.49        | Inc-CAMSAP2-2    | 3.53     | 1.58        | Inc-MC2R-2            | 3.49     | 1.81         | Inc-SYT8-3         | 3.71     | 1.48        |
| Inc-LMTK2-3      | -3.80    | 0.56        | Inc-C1orf132-1   | 3.53     | 2.65        | Inc-SCYL1-1           | 3.49     | 1.38         | Inc-SENP5-4        | 3.71     | 1.74        |
| Inc-RNF135-1     | -3.73    | 0.48        | Inc-MMADHC-8     | 3.44     | 1.43        | Inc-NTNG1-2           | 3.39     | 2.20         | Inc-KIF20B-7       | 3.66     | 1.46        |
| Inc-PLXNC1-4     | -3.72    | 0.63        | Inc-PTPDC1-7     | 3.34     | 1.51        | Inc-UCP2-1            | 3.39     | 1.49         | Inc-BCL11A-7       | 3.58     | 1.68        |
| Inc-SEL1L3-6     | -3.70    | 0.37        | Inc-MON2-2       | 3.32     | 1.43        | Inc-C3orf25-2         | 3.38     | 1.52         | Inc-TLE4-6         | 3.49     | 1.46        |
| Inc-PQLC2-5      | -3.69    | 0.54        | Inc-CHRD2-3      | 3.27     | 1.90        | Inc-SBDS-19           | 3.38     | 1.93         | Inc-APPBP2-3       | 3.48     | 1.44        |
| Inc-B3GNT5-1     | -3.69    | 0.61        | Inc-RLIM-6       | 3.25     | 1.35        | Inc-TOR1AIP2-5        | 3.35     | 1.87         | Inc-SCYL1-1        | 3.46     | 1.41        |
| Inc-XRN2-2       | -3.66    | 0.65        | Inc-RYR2-5       | 3.18     | 1.78        | Inc-CAMSAP2-2         | 3.29     | 1.49         | Inc-GGT1-5         | 3.43     | 1.59        |
| Inc-C2orf173-4   | -3.62    | 0.34        | Inc-AC09336.1-1  | 3.17     | 1.53        | Inc-ANGPTL1-3         | 3.27     | 1.66         | Inc-C3orf25-2      | 3.37     | 1.52        |
| Inc-OR2AG2-1     | -3.50    | 0.45        | Inc-BZRAP1-1     | 3.16     | 2.66        | Inc-BARX2-3           | 3.27     | 1.43         | Inc-CHRD2-3        | 3.35     | 1.77        |
| Inc-ZNF746-3     | -3.45    | 0.60        | Inc-WDR74-1      | 3.14     | 1.96        | Inc-LIPG-3            | 3.25     | 2.38         | Inc-RLIM-6         | 3.32     | 1.47        |
| Inc-C14orf49-4   | -3.34    | 0.46        | Inc-TARBP1-6     | 3.13     | 1.54        | Inc-FOXM1-4           | 3.16     | 1.79         | Inc-USP25-2        | 3.31     | 2.21        |
| Inc-ZNF716-15    | -3.34    | 0.44        | Inc-GCNT4-4      | 3.13     | 2.18        | Inc-PTPDC1-7          | 3.15     | 1.45         | Inc-VN1R2-4        | 3.31     | 1.61        |
| Inc-SNURF-2      | -3.21    | 0.37        | Inc-UCP2-1       | 3.10     | 1.44        | Inc-AC078802.1-2      | 3.12     | 2.32         | Inc-SRGAP3-1       | 3.31     | 1.85        |
| Inc-PLA2G5-2     | -3.20    | 0.71        | Inc-CRNKL1-4     | 3.06     | 1.58        | Inc-C1orf132-1        | 3.11     | 1.99         | Inc-ZPLD1-7        | 3.26     | 1.28        |
| Inc-KCNMA1-6     | -3.19    | 0.73        | Inc-USP25-2      | 3.05     | 1.86        | Inc-ILSRA-11          | 3.05     | 1.57         | Inc-TMEM111-1      | 3.24     | 1.56        |
| Inc-TMEM14E-8    | -3.18    | 0.58        | Inc-PAIP1-3      | 3.01     | 1.53        | Inc-UXS1-6            | 3.05     | 1.32         | Inc-ORS5P3-1       | 3.22     | 1.89        |
| Inc-CA14-3       | -3.18    | 0.61        | Inc-PAN3-2       | 2.97     | 1.34        | Inc-HXNRP1-1          | 3.01     | 1.99         | Inc-PACRGL-9       | 3.22     | 1.47        |
| Inc-ENDOD1-7     | -3.16    | 0.66        | Inc-ANGPTL1-3    | 2.88     | 1.62        | Inc-LETM1-1           | 3.01     | 1.41         | Inc-OTUB2-1        | 3.17     | 1.38        |
| Inc-ATL3-1       | -3.16    | 0.58        | Inc-KIAA1755-5   | 2.85     | 1.74        | Inc-PACRGL-9          | 3.00     | 1.49         | Inc-ANGPTL1-3      | 3.16     | 1.69        |
| Inc-REST-8       | -3.15    | 0.64        | Inc-SYT8-3       | 2.82     | 1.34        | Inc-POLR3G-1          | 2.98     | 1.87         | Inc-UXS1-6         | 3.16     | 1.34        |
| Inc-PKIB-1       | -3.09    | 0.62        | Inc-LETM1-1      | 2.80     | 1.34        | Inc-RLIM-6            | 2.98     | 1.43         | Inc-AC090699.1.1-1 | 3.11     | 1.99        |
| Inc-GGCX-2       | -3.07    | 0.59        | Inc-ARFIP1-5     | 2.80     | 1.92        | Inc-GPRC5A-4          | 2.97     | 1.58         | Inc-CXCR3-13       | 3.10     | 1.67        |
| Inc-ZNF583-4     | -3.04    | 0.54        | Inc-C12orf50-6   | 2.79     | 1.63        | Inc-BZRAP1-1          | 2.94     | 2.24         | Inc-PTPDC1-7       | 3.08     | 1.55        |
| Inc-AKR7A3-1     | -3.01    | 0.59        | Inc-TOR1AIP2-5   | 2.77     | 1.85        | Inc-PAN3-2            | 2.92     | 1.37         | Inc-ZNF737-3       | 3.05     | 1.97        |
| Inc-SNHG15-1     | -2.99    | 0.50        | Inc-ATL3-1       | -7.86    | 0.43        | Inc-ORS5P3-1          | 2.87     | 1.73         | Inc-SMTNL2-3       | 2.99     | 1.54        |
| Inc-LHFPL3-2     | -2.98    | 0.70        | Inc-ADAP2-2      | -4.42    | 0.62        | Inc-MYCN-8            | 2.82     | 1.54         | Inc-EIF2B3-1       | 2.95     | 1.42        |
| Inc-DDOST-1      | -2.98    | 0.61        | Inc-AC100793.1-1 | -4.38    | 0.49        | Inc-SRGAP3-1          | 2.80     | 1.56         | Inc-ARFIP1-5       | 2.95     | 1.87        |
| Inc-BCOR-8       | -2.97    | 0.62        | Inc-LMTK2-3      | -4.25    | 0.57        | Inc-GLRA2-2           | 2.79     | 1.41         | Inc-CRNKL1-4       | 2.92     | 1.47        |
| Inc-PUS10-3      | -2.95    | 0.62        | Inc-STOM-7       | -3.89    | 0.33        | Inc-DHX8-2            | 2.79     | 1.54         | Inc-ATG12-3        | 2.89     | 1.52        |
| Inc-BTD-2        | -2.94    | 0.65        | Inc-PLXNC1-4     | -3.85    | 0.67        | Inc-SYT8-3            | 2.75     | 1.37         | Inc-GNAI2-1        | 2.87     | 1.43        |
| Inc-TRIM74-4     | -2.90    | 0.70        | Inc-SNURF-1      | -3.70    | 0.42        | Inc-PAIP1-3           | 2.64     | 1.45         | Inc-KEAP1-1        | 2.84     | 1.79        |
| Inc-ELMOD2-2     | -2.90    | 0.73        | Inc-PQLC2-5      | -3.66    | 0.59        | Inc-DNAJC16-1         | 2.64     | 1.40         | Inc-PNRC1-1        | 2.81     | 1.51        |
| Inc-ANKRD9-4     | -2.89    | 0.68        | Inc-SNURF-3      | -3.64    | 0.38        | Inc-ZNF737-3          | 2.64     | 1.74         | Inc-MPDZ-8         | 2.80     | 1.32        |
| Inc-NSUN2-4      | -2.89    | 0.78        | Inc-SEMA4B-4     | -3.46    | 0.70        | Inc-CXCR3-13          | 2.64     | 1.44         | Inc-ELOVL6-2       | 2.75     | 1.32        |
| Inc-CCNB1IP1-1   | -2.89    | 0.61        | Inc-ANAPC7-1     | -3.40    | 0.58        | Inc-ROPN1B-7          | 2.60     | 1.38         | Inc-MYO10-9        | 2.74     | 1.35        |
| Inc-LRRC47-1     | -2.86    | 0.55        | Inc-GGCX-2       | -3.40    | 0.61        | Inc-SERPINC1-1        | 2.60     | 1.72         | Inc-CAMSAP2-2      | 2.70     | 1.36        |
| Inc-CPNE1-2      | -2.81    | 0.46        | Inc-SEL1L3-6     | -3.37    | 0.43        | Inc-ESR2-1            | 2.58     | 1.52         | Inc-ATL3-1         | -5.86    | 0.48        |
| Inc-POLDIP3-2    | -2.78    | 0.63        | Inc-AGXT2L1-1    | -3.25    | 0.67        | Inc-C14orf126-4       | 2.58     | 1.41         | Inc-SEL1L3-6       | -5.85    | 0.17        |
| Inc-HEXB-3       | -2.78    | 0.70        | Inc-HSFY2-10     | -3.22    | 0.29        | Inc-RP11-168K9.2.1-6  | 2.55     | 1.25         | Inc-HSFY2-10       | -5.69    | 0.16        |
| Inc-TAMM41-3     | -2.78    | 0.56        | Inc-GALNT7-3     | -3.17    | 0.55        | Inc-TMPRSS2-4         | 2.55     | 1.43         | Inc-STOM-7         | -5.58    | 0.24        |
| Inc-PGBD1-1      | -2.77    | 0.66        | Inc-LHFPL3-2     | -3.10    | 0.71        | Inc-ZSCAN2-5          | 2.55     | 1.46         | Inc-SNURF-1        | -5.21    | 0.27        |
| Inc-DEPTOR-2     | -2.74    | 0.79        | Inc-IL17RA-4     | -3.05    | 0.58        | Inc-MYO10-9           | 2.54     | 1.32         | Inc-SNURF-3        | -5.10    | 0.25        |
| Inc-FMNL1-1      | -2.73    | 0.70        |                  |          |             | Inc-AIDA-1            | 2.52     | 1.78         | Inc-AC100793.1-1   | -4.82    | 0.50        |
|                  |          |             |                  |          |             | Inc-TRIM28-1          | 2.52     | 1.38         | Inc-ZNF716-15      | -4.38    | 0.36        |
|                  |          |             |                  |          |             | Inc-BCL11A-7          | 2.49     | 1.37         | Inc-BACH1-1        | -4.29    | 0.44        |
|                  |          |             |                  |          |             | Inc-TMEM111-1         | 2.49     | 1.43         | Inc-NVL-6          | -4.24    | 0.47        |
|                  |          |             |                  |          |             | Inc-SMTNL2-3          | 2.48     | 1.35         | Inc-ADAP2-2        | -4.17    | 0.62        |
|                  |          |             |                  |          |             | Inc-FDXACB1-2         | 2.48     | 1.36         | Inc-CISH-3         | -4.05    | 0.61        |
|                  |          |             |                  |          |             | Inc-USP25-2           | 2.47     | 1.84         | Inc-LRRC47-1       | -4.01    | 0.44        |
|                  |          |             |                  |          |             | Inc-RP11-110H1.12.1-3 | 2.46     | 1.28         | Inc-HEPH-1         | -3.89    | 0.58        |
|                  |          |             |                  |          |             | Inc-SYNCRIP-2         | 2.46     | 1.63         | Inc-KDM5D-3        | -3.64    | 0.47        |
|                  |          |             |                  |          |             | Inc-CYorf17-1         | 2.45     | 1.58         | Inc-OR2AG2-1       | -3.54    | 0.37        |
|                  |          |             |                  |          |             | Inc-AGBL1-4           | 2.45     | 2.14         | Inc-GGCX-2         | -3.47    | 0.56        |
|                  |          |             |                  |          |             | Inc-GNAI2-1           | 2.45     | 1.36         | Inc-SNX29P2-3      | -3.47    | 0.58        |
|                  |          |             |                  |          |             | Inc-ATL3-1            | -5.15    | 0.51         | Inc-TMEM75-5       | -3.45    | 0.52        |
|                  |          |             |                  |          |             | Inc-ADAP2-2           | -5.03    | 0.64         | Inc-Cyorf15A.1-2   | -3.41    | 0.22        |
|                  |          |             |                  |          |             | Inc-STOM-7            | -4.88    | 0.33         | Inc-PGBD1-1        | -3.39    | 0.58        |
|                  |          |             |                  |          |             | Inc-AC100793.1-1      | -4.32    | 0.53         | Inc-PLXNC1-4       | -3.22    | 0.66        |
|                  |          |             |                  |          |             | Inc-CISH-3            | -4.18    | 0.64         | Inc-PQLC2-5        | -3.15    | 0.58        |
|                  |          |             |                  |          |             | Inc-HSFY2-10          | -3.77    | 0.26         | Inc-RNF135-1       | -3.15    | 0.51        |
|                  |          |             |                  |          |             | Inc-LRRC47-1          | -3.53    | 0.47         | Inc-ANAPC7-1       | -3.15    | 0.55        |
|                  |          |             |                  |          |             | Inc-NVL-6             | -3.47    | 0.57         | Inc-LHFPL3-2       | -3.14    | 0.67        |
|                  |          |             |                  |          |             | Inc-TCL1B-2           | -3.32    | 0.75         | Inc-NBR2-1         | -3.12    | 0.60        |
|                  |          |             |                  |          |             |                       |          | Inc-ULBP3-3  | -3.08              | 0.53     |             |
|                  |          |             |                  |          |             |                       |          | Inc-DIRAS2-6 | -3.06              | 0.57     |             |
|                  |          |             |                  |          |             |                       |          | Inc-SEMA4B-4 | -3.02              | 0.67     |             |
|                  |          |             |                  |          |             |                       |          | Inc-LMTK2-3  | -3.01              | 0.59     |             |

**Supplementary Table S1 : Modulated lncRNAs between N controls and MGUS, sMM, MM or PCL patients.**

**Supplementary Table S2A: Modulated lncRNAs between HD+ and HD- MM patients.**

|             | <b>Gene Name</b> | <b>Score(d)</b> | <b>Fold Change</b> |
|-------------|------------------|-----------------|--------------------|
| <b>HD +</b> | lnc-METTL8-3     | 6.52            | 1.94               |
|             | lnc-RYR2-5       | 5.49            | 1.60               |
|             | lnc-SBDS-19      | 5.13            | 1.70               |
|             | lnc-TARBP1-6     | 4.99            | 1.43               |
|             | lnc-GPRC5A-4     | 4.92            | 1.51               |
|             | lnc-FBXO11-4     | 4.52            | 1.46               |
|             | lnc-MYCN-8       | 4.44            | 1.46               |
|             | lnc-KTN1-4       | 4.29            | 1.34               |
|             | lnc-AC009336.1   | 4.27            | 1.32               |
|             | lnc-ALDH3B2-1    | 4.22            | 1.44               |
|             | lnc-PACRGL-11    | 4.20            | 3.28               |
|             | lnc-ZNF300-1     | 4.00            | 1.51               |
|             | lnc-IL5RA-11     | 3.94            | 1.37               |
|             | lnc-FAM65B-3     | 3.87            | 1.78               |
|             | lnc-CRNKL1-4     | 3.82            | 1.33               |
|             | lnc-CAMSAP2-2    | 3.63            | 1.28               |
|             | lnc-MC2R-2       | 3.57            | 1.43               |
|             | lnc-DHX8-2       | 3.55            | 1.34               |
|             | lnc-APC-6        | 3.41            | 1.56               |
|             | lnc-GUF1-7       | 3.35            | 1.28               |
|             | lnc-FAM110B-2    | 3.26            | 1.55               |
|             | lnc-PAIP1-3      | 3.18            | 1.26               |
|             | lnc-NKX2-4-5     | 3.09            | 1.35               |
|             | lnc-MUC15-3      | 3.04            | 1.40               |
|             | lnc-DAOA-10      | 2.94            | 1.20               |
|             | lnc-MAGEB5-6     | 2.93            | 1.30               |
|             | lnc-AL901608.1   | 2.89            | 1.97               |
|             | lnc-SNURF-3      | 2.89            | 1.49               |
|             | lnc-DPF3-3       | 2.85            | 1.41               |
|             | lnc-ATG12-3      | 2.84            | 1.25               |
|             | lnc-TUSC3-3      | 2.81            | 1.17               |
|             | lnc-WBSCR17-1    | 2.80            | 1.33               |
|             | lnc-WDTC1-4      | 2.79            | 1.19               |
|             | lnc-SNURF-1      | 2.70            | 1.38               |
|             | lnc-NAPEPLD-5    | 2.69            | 1.46               |
|             | lnc-C9orf100-1   | 2.69            | 1.21               |
|             | lnc-MC5R-1       | 2.65            | 1.63               |
|             | lnc-BCL11A-7     | 2.64            | 1.22               |
|             | lnc-MAN2B1-1     | 2.62            | 1.28               |
|             | lnc-SMARCA5-4    | 2.62            | 1.21               |
|             | lnc-FDXACB1-2    | 2.58            | 1.22               |
|             | lnc-C3orf25-2    | 2.58            | 1.22               |
|             | lnc-TRPV2-1      | 2.56            | 1.29               |
|             | lnc-TRPV4-1      | 2.55            | 1.29               |
|             | lnc-DDOST-1      | -4.53           | 0.65               |
|             | lnc-ZCCHC17-4    | -3.73           | 0.73               |
| lnc-ECD-2   | -3.65            | 0.72            |                    |

**Supplementary Table S2B: Modulated lncRNAs between t(11;14)+ and t(11;14)-MM patients.**

|  | Gene Name        | Score(d) | Fold Change |
|--|------------------|----------|-------------|
|  | lnc-UQCRFS1-3    | 5.77     | 2.29        |
|  | lnc-MC2R-2       | 4.42     | 1.53        |
|  | lnc-ACTR1B-5     | 4.41     | 2.04        |
|  | lnc-C6orf183-1   | 4.39     | 1.34        |
|  | lnc-ZNF300-1     | 4.14     | 1.54        |
|  | lnc-RYR2-5       | 4.13     | 1.46        |
|  | lnc-METTL8-3     | 4.01     | 1.59        |
|  | lnc-BCL11A-7     | 3.96     | 1.33        |
|  | lnc-GUF1-7       | 3.94     | 1.34        |
|  | lnc-LINS-1       | 3.81     | 1.63        |
|  | lnc-MYCN-8       | 3.74     | 1.40        |
|  | lnc-DHX8-2       | 3.66     | 1.35        |
|  | lnc-AC009336.1-ε | 3.54     | 1.27        |
|  | lnc-WDR74-1      | 3.52     | 1.53        |
|  | lnc-TARBP1-6     | 3.44     | 1.31        |
|  | lnc-ABC5-3       | 3.42     | 1.50        |
|  | lnc-NOL6-1       | 3.42     | 1.44        |
|  | lnc-SEMA3D-3     | 3.39     | 1.23        |
|  | lnc-EIF2B3-1     | 3.30     | 1.22        |
|  | lnc-MAGEB5-6     | 3.23     | 1.34        |
|  | lnc-SBDS-19      | 3.22     | 1.44        |
|  | lnc-AL901608.1-1 | 3.19     | 2.28        |
|  | lnc-PAIP1-3      | 3.18     | 1.27        |
|  | lnc-TRPV4-1      | 3.15     | 1.37        |
|  | lnc-CCNB1IP1-1   | 3.15     | 1.32        |
|  | lnc-ANKRD36BP1   | 3.08     | 1.35        |
|  | lnc-MC5R-1       | 3.05     | 1.79        |
|  | lnc-DUSP26-9     | 3.03     | 1.25        |
|  | lnc-FAM65B-3     | 3.02     | 1.62        |
|  | lnc-CHRD2-3      | 3.02     | 1.36        |
|  | lnc-SYT8-3       | 3.00     | 1.21        |
|  | lnc-KTN1-4       | 3.00     | 1.25        |
|  | lnc-GPRC5A-4     | 2.94     | 1.30        |
|  | lnc-FAM110B-2    | 2.94     | 1.51        |
|  | lnc-TRPV2-1      | 2.94     | 1.34        |
|  | lnc-CRNKL1-4     | 2.89     | 1.25        |
|  | lnc-C11orf31-2   | 2.85     | 1.31        |
|  | lnc-MFSD4-8      | 2.81     | 1.27        |
|  | lnc-SMTNL2-3     | 2.79     | 1.20        |
|  | lnc-LGALS14-1    | 2.78     | 1.49        |
|  | lnc-WDR73-3      | 2.76     | 1.47        |
|  | lnc-FBXO11-4     | 2.72     | 1.28        |
|  | lnc-RBMXL3-2     | 2.70     | 1.18        |
|  | lnc-SDCBP-2      | 2.69     | 1.19        |
|  | lnc-POLR2J-1     | 2.68     | 1.22        |
|  | lnc-RP11-63E5.6. | 2.65     | 1.19        |
|  | lnc-PRICKLE2-2   | 2.63     | 1.19        |
|  | lnc-LRRC47-1     | -6.46    | 0.48        |
|  | lnc-ZCCHC17-4    | -5.84    | 0.64        |
|  | lnc-DDOST-1      | -5.36    | 0.60        |
|  | lnc-ECD-2        | -5.25    | 0.63        |
|  | lnc-TMEM234-3    | -5.09    | 0.63        |
|  | lnc-SPRYD7-1     | -4.79    | 0.54        |
|  | lnc-CPNE1-2      | -4.75    | 0.45        |
|  | lnc-SEL1L3-6     | -4.39    | 0.33        |
|  | lnc-B4GALNT3-2   | -4.36    | 0.68        |
|  | lnc-C20orf173-4  | -4.36    | 0.48        |
|  | lnc-SERPINB9-1   | -4.36    | 0.60        |
|  | lnc-MARVELD3-3   | -4.36    | 0.59        |
|  | lnc-WRNIP1-36    | -4.36    | 0.69        |
|  | lnc-SYT16-2      | -4.36    | 0.71        |
|  | lnc-ACOT1-2      | -4.36    | 0.81        |
|  | lnc-NMUR1-1      | -4.36    | 0.67        |
|  | lnc-DEF8-2       | -4.36    | 0.78        |
|  | lnc-UHRF1BP1L-2  | -4.36    | 0.82        |
|  | lnc-BCL2L13-1    | -4.36    | 0.73        |
|  | lnc-FAM60A-6     | -4.36    | 0.71        |
|  | lnc-MYO10-1      | -4.36    | 0.77        |
|  | lnc-CIAO1-1      | -4.36    | 0.77        |

**Supplementary Table S2C: Modulated lncRNAs between t(4;14)+ and t(4;14)-MM patients.**

|                  | <b>Gene Name</b> | <b>Score(d)</b> | <b>Fold Change</b> |
|------------------|------------------|-----------------|--------------------|
| <b>t(4;14) +</b> | lnc-CAMSAP2-2    | 4.59            | 1.46               |
|                  | lnc-IL5RA-11     | 4.40            | 1.54               |
|                  | lnc-MAN2B1-1     | 4.29            | 1.63               |
|                  | lnc-SBDS-19      | 4.10            | 1.75               |
|                  | lnc-GPRC5A-4     | 4.04            | 1.55               |
|                  | lnc-GREB1-10     | 3.96            | 1.53               |
|                  | lnc-NKX2-4-5     | 3.88            | 1.60               |
|                  | lnc-ATG12-3      | 3.87            | 1.46               |
|                  | lnc-RYR2-5       | 3.63            | 1.53               |
|                  | lnc-FBXO11-4     | 3.60            | 1.49               |
|                  | lnc-GPR160-1     | 3.57            | 1.68               |
|                  | lnc-XRN2-2       | 3.42            | 1.36               |
|                  | lnc-FDXACB1-2    | 3.39            | 1.38               |
|                  | lnc-ZSCAN2-5     | 3.37            | 1.44               |
|                  | lnc-KTN1-4       | 3.28            | 1.35               |
|                  | lnc-C14orf49-4   | 3.23            | 1.99               |
|                  | lnc-CRNKL1-4     | 3.07            | 1.34               |
|                  | lnc-METTL8-3     | 3.01            | 1.56               |
|                  | lnc-TBPL2-1      | 2.97            | 1.57               |
|                  | lnc-WDTC1-4      | 2.93            | 1.25               |
|                  | lnc-RP1-241P17.  | 2.92            | 1.22               |
|                  | lnc-RCOR3-1      | 2.89            | 1.23               |
|                  | lnc-NFKB1-4      | 2.78            | 1.30               |
|                  | lnc-IRG1-2       | 2.76            | 1.22               |
|                  | lnc-DPF3-3       | 2.75            | 1.53               |
|                  | lnc-IRF2-3       | 2.74            | 1.31               |
|                  | lnc-ALDH3B2-1    | 2.73            | 1.38               |
|                  | lnc-NBN-2        | 2.71            | 1.51               |
|                  | lnc-PSMB7-1      | 2.70            | 1.38               |
|                  | lnc-OR2AG2-1     | 2.67            | 1.81               |
|                  | lnc-ZNF716-15    | 2.67            | 1.57               |
|                  | lnc-LRRC47-1     | 2.63            | 1.54               |
|                  | lnc-RPS4XP21-6   | 2.63            | 1.21               |
|                  | lnc-ACO1-6       | 2.62            | 1.52               |
|                  | lnc-YBEY-2       | 2.62            | 1.33               |
|                  | lnc-CUX1-2       | 2.59            | 1.29               |
|                  | lnc-NEK3-1       | 2.58            | 1.38               |
|                  | lnc-GCNT2-2      | -4.65           | 0.44               |
|                  | lnc-ZNF717-1     | -4.30           | 0.64               |
|                  | lnc-WHSC2-2      | -4.26           | 0.78               |
|                  | lnc-LETM1-1      | -4.18           | 0.70               |
|                  | lnc-NPHP1-1      | -3.64           | 0.59               |
|                  | lnc-CD46-4       | -3.56           | 0.69               |
|                  | lnc-CLGN-1       | -3.48           | 0.75               |

**Supplementary Table S2D: Modulated lncRNAs between MAF+ and MAF-MM patients.**

|              | <b>Gene Name</b> | <b>Score(d)</b> | <b>Fold Change</b> |
|--------------|------------------|-----------------|--------------------|
| <b>MAF +</b> | lnc-ANKRD30B-7   | 3.58            | 5.78               |
|              | lnc-FAM65B-3     | 3.53            | 3.20               |
|              | lnc-CXorf36-1    | 3.28            | 3.81               |
|              | lnc-WDR89-1      | 3.20            | 1.44               |
|              | lnc-ACO1-6       | 3.18            | 2.32               |
|              | lnc-ZNF22-2      | -6.17           | 0.28               |
|              | lnc-AC005493.1-1 | -5.15           | 0.53               |
|              | lnc-MAP1LC3B2-2  | -4.85           | 0.35               |
|              | lnc-MAP1LC3B2-4  | -4.82           | 0.32               |
|              | lnc-MRPL39-5     | -4.17           | 0.59               |
|              | lnc-OTX2-6       | -3.94           | 0.57               |
|              | lnc-RXFP2-1      | -3.89           | 0.50               |
|              | lnc-ANKS4B-1     | -3.83           | 0.37               |
|              | lnc-JAM2-2       | -3.76           | 0.08               |
|              | lnc-LIPG-3       | -3.59           | 0.28               |
|              | lnc-FAM90A1-1    | -3.55           | 0.59               |
|              | lnc-IER5-2       | -3.49           | 0.54               |
|              | lnc-AC068020.1-1 | -3.34           | 0.59               |
|              | lnc-C17orf46-3   | -3.32           | 0.58               |
|              | lnc-CELA3A-1     | -3.16           | 0.53               |
|              | lnc-FAM69C-2     | -3.13           | 0.39               |
|              | lnc-RBM11-5      | -3.10           | 0.66               |
|              | lnc-USP25-2      | -3.06           | 0.38               |
|              | lnc-LTA4H-4      | -3.05           | 0.66               |
|              | lnc-ZNF721-1     | -2.98           | 0.52               |
|              | lnc-ARID5A-3     | -2.94           | 0.53               |

**Supplementary Table S3: List of 518 differentially expressed genes in MALAT quartile I vs quartile IV by SAM analysis at high stringency level (median FDR=0, 90th perc FDR=0). Genes are ordered according to SAM score, the fold change (FC) is also reported.**

| Gene Name | Score(d) | FC     | Gene Name | Score(d) | FC      |
|-----------|----------|--------|-----------|----------|---------|
| ST20      | 6.9055   | 2.3966 | MALAT1    | -11.0931 | -1.3961 |
| NDUFAF3   | 6.6968   | 2.1369 | USP47     | -7.5270  | -1.9633 |
| CCDC97    | 6.6830   | 2.0026 | SYF2      | -7.3172  | -2.1373 |
| MNF1      | 6.6295   | 2.6202 | WDR48     | -6.9632  | -2.1348 |
| BTBD2     | 6.5947   | 1.8623 | GGNBP2    | -6.8694  | -2.0983 |
| MRPS11    | 6.5381   | 2.5786 | FXR1      | -6.7628  | -1.9732 |
| TMEM223   | 6.4864   | 2.2075 | MORF4L1   | -6.7552  | -1.7107 |
| PEX11B    | 6.3185   | 2.1294 | MFN1      | -6.6958  | -1.8638 |
| EXOSC4    | 6.3034   | 1.9055 | EWSR1     | -6.6385  | -2.0545 |
| COX5B     | 6.2897   | 2.9514 | DHX15     | -6.6105  | -1.8490 |
| C9orf114  | 6.2499   | 1.5969 | PNN       | -6.5204  | -1.9905 |
| SNAPC3    | 6.2418   | 2.2073 | GTPBP4    | -6.4839  | -2.1545 |
| ZNF641    | 6.2345   | 1.7449 | SART1     | -6.4743  | -2.0592 |
| PSMC4     | 6.2113   | 1.7165 | MTMR14    | -6.3970  | -1.7561 |
| MRPL51    | 6.1872   | 1.9746 | PDCD4     | -6.3798  | -3.0419 |
| SAMM50    | 6.1062   | 2.0815 | NMD3      | -6.3183  | -2.3006 |
| MEA1      | 6.0647   | 2.1221 | RNF6      | -6.2967  | -1.9764 |
| ORMDL2    | 5.9729   | 2.3305 | KIN       | -6.2831  | -1.7434 |
| ATP5G1    | 5.9625   | 4.4712 | RNF11     | -6.2643  | -1.9917 |
| KCTD13    | 5.9300   | 1.8231 | HNRNPM    | -6.2301  | -2.1023 |
| NABP2     | 5.9129   | 1.7890 | HNRNPH1   | -6.1444  | -1.9047 |
| GSK3A     | 5.8463   | 1.9480 | NAA30     | -6.1342  | -1.7443 |
| HAUS1     | 5.7775   | 2.3305 | SREK1     | -6.1031  | -1.5718 |
| C14orf1   | 5.7586   | 2.2388 | DCUN1D1   | -6.0888  | -1.6630 |
| TUBG1     | 5.6992   | 2.1535 | GBE1      | -6.0391  | -1.9361 |
| MRPL40    | 5.6635   | 2.0639 | BNIP2     | -6.0306  | -1.7554 |
| MRPS14    | 5.6474   | 1.7811 | TMF1      | -5.9383  | -1.8334 |
| MPI       | 5.6309   | 1.8136 | HARB1     | -5.9191  | -1.6589 |
| SDHC      | 5.6045   | 1.9664 | RAB1A     | -5.9012  | -1.5449 |
| PTPLB     | 5.5957   | 1.8297 | RNF149    | -5.8705  | -1.8538 |
| MLLT1     | 5.5652   | 1.6159 | AMD1      | -5.8648  | -1.7263 |
| BRK1      | 5.5580   | 2.0752 | B3GNT2    | -5.8520  | -2.3296 |
| HCFC1     | 5.5531   | 1.9860 | FAR1      | -5.8506  | -1.6563 |
| C9orf123  | 5.5523   | 2.1626 | INSIG2    | -5.8222  | -2.1010 |
| C16orf70  | 5.5465   | 1.6159 | SNX4      | -5.7911  | -1.9361 |
| DDT       | 5.5463   | 2.3499 | RABGEF1   | -5.7645  | -1.7396 |
| NEDD8     | 5.5215   | 1.9167 | SRSF4     | -5.7583  | -1.5838 |
| TPGS2     | 5.5190   | 2.0950 | ACAA1     | -5.7427  | -1.6193 |
| UBL5      | 5.5026   | 1.6773 | RPSA      | -5.7208  | -3.0622 |
| MPV17     | 5.4888   | 2.0583 | RABGGTB   | -5.7110  | -1.8517 |
| C19orf47  | 5.4843   | 1.5391 | SENP5     | -5.6903  | -1.6604 |
| DCAKD     | 5.4713   | 1.9583 | FKBP2     | -5.6724  | -2.9230 |
| LMAN2     | 5.4643   | 1.8887 | BTAF1     | -5.6684  | -1.5858 |
| PPP1R11   | 5.4640   | 1.7769 | SRSF5     | -5.6641  | -1.8492 |
| PPP1R7    | 5.4612   | 1.7142 | THRAP3    | -5.6497  | -1.5968 |
| SNAPIN    | 5.4521   | 1.6866 | SNW1      | -5.6422  | -1.6881 |
| ZNRD1     | 5.4316   | 1.8471 | PDIK1L    | -5.6409  | -2.0258 |
| POLR2H    | 5.4313   | 2.1925 | DNAJA2    | -5.6256  | -1.9115 |
| NUDT5     | 5.4266   | 1.9715 | C11orf58  | -5.6235  | -1.6583 |
| MFF       | 5.4188   | 1.6968 | DDX21     | -5.6160  | -1.8589 |
| MGC57346  | 5.3946   | 2.3561 | RAB18     | -5.5982  | -1.8403 |
| C11orf24  | 5.3833   | 1.8428 | SF3B2     | -5.5975  | -1.5471 |
| NDUFV3    | 5.3810   | 1.7310 | FOXO4     | -5.5797  | -1.4455 |
| COX16     | 5.3789   | 2.0978 | RBM3      | -5.5684  | -1.6378 |
| XRCC6BP1  | 5.3605   | 2.0809 | LEMD2     | -5.5553  | -1.4164 |
| PKD2      | 5.3585   | 1.6492 | SPTY2D1   | -5.5471  | -1.8814 |
| KIAA0195  | 5.3478   | 1.5550 | ISY1      | -5.5379  | -2.1647 |
| NDRG3     | 5.3416   | 2.0911 | CCNL1     | -5.5280  | -1.5936 |
| MRPS24    | 5.3296   | 1.8271 | AZIN1     | -5.5261  | -2.0774 |
| NCDN      | 5.3021   | 1.7267 | DLD       | -5.5165  | -1.8402 |
| YAE1D1    | 5.2895   | 2.2750 | ATAD1     | -5.5001  | -1.6658 |
| GTF2A2    | 5.2885   | 2.2038 | CARS      | -5.4866  | -1.8002 |

| Gene Name    | Score(d) | FC     |
|--------------|----------|--------|
| MED12        | 5.2790   | 1.7484 |
| VAMP4        | 5.2618   | 1.9086 |
| PRR12        | 5.2562   | 1.4400 |
| XRCC1        | 5.2268   | 1.6764 |
| TMEM141      | 5.2187   | 1.7945 |
| PSMD8        | 5.2158   | 1.8141 |
| SKP2         | 5.2125   | 2.0097 |
| COMMD1       | 5.2113   | 1.5214 |
| SPRYD4       | 5.1985   | 1.7956 |
| TMEM14B      | 5.1911   | 1.8463 |
| CLN6         | 5.1865   | 2.1009 |
| SLC30A6      | 5.1725   | 1.7591 |
| ATRAID       | 5.1656   | 1.9040 |
| TMEM254      | 5.1610   | 2.1664 |
| LOC100128288 | 5.1529   | 1.7704 |
| COX6A1       | 5.1423   | 1.9900 |
| PCGF6        | 5.1398   | 1.6136 |
| CCDC167      | 5.1376   | 1.9311 |
| LDB1         | 5.1266   | 1.6579 |
| ATP6V1F      | 5.1199   | 1.9496 |
| ARID1A       | 5.1123   | 1.8160 |
| DENND4B      | 5.1107   | 1.6637 |
| PHKG2        | 5.1034   | 1.5357 |
| GSTM4        | 5.0946   | 2.0812 |
| DCP1B        | 5.0806   | 1.8270 |
| INTS3        | 5.0790   | 1.9138 |
| ALG10B       | 5.0751   | 3.0766 |
| TIMM50       | 5.0736   | 1.6016 |
| TMEM179B     | 5.0566   | 1.9878 |
| MRPS21       | 5.0544   | 2.1245 |
| ACOT13       | 5.0481   | 2.4009 |
| MRI1         | 5.0469   | 1.7706 |
| HNRNPUL1     | 5.0424   | 1.5741 |
| ASB12        | 5.0414   | 1.4162 |
| UXT          | 5.0378   | 1.9093 |
| STK38        | 5.0346   | 1.9371 |
| TAF6         | 5.0307   | 1.5595 |
| ZNF391       | 5.0273   | 2.7049 |
| POLR2F       | 5.0269   | 1.4525 |
| CLEC16A      | 5.0184   | 1.6075 |
| CAPN3        | 5.0097   | 1.8714 |
| ATXN2        | 5.0060   | 1.7640 |
| TIMMDC1      | 5.0055   | 1.8774 |
| SHKBP1       | 5.0035   | 1.5313 |
| C11orf71     | 5.0012   | 1.7987 |
| ATMIN        | 4.9998   | 1.6887 |
| CIAO1        | 4.9928   | 1.4422 |
| ZRANB3       | 4.9817   | 1.8413 |
| C16orf13     | 4.9730   | 1.5260 |
| PIGM         | 4.9673   | 1.7665 |
| SH2D3C       | 4.9606   | 1.5953 |
| C8orf40      | 4.9584   | 1.7562 |
| MRPL43       | 4.9381   | 1.3519 |
| ABI2         | 4.9303   | 1.8099 |
| TMSB10       | 4.9260   | 1.8174 |
| UFC1         | 4.9206   | 1.9551 |
| LCLAT1       | 4.9192   | 1.9489 |
| PAFAH1B3     | 4.9168   | 1.6509 |
| STK25        | 4.9152   | 1.4148 |
| CHAC2        | 4.9133   | 2.1256 |
| ATP7A        | 4.9123   | 1.5664 |
| PNPLA4       | 4.9108   | 2.0275 |

| Gene Name | Score(d) | FC      |
|-----------|----------|---------|
| ZFYVE20   | -5.4826  | -1.5610 |
| ORMDL3    | -5.4813  | -1.9846 |
| PRPF39    | -5.4707  | -1.6315 |
| MINOS1    | -5.4593  | -2.5319 |
| MED4      | -5.4592  | -1.7629 |
| CLPX      | -5.4312  | -1.7572 |
| DDX42     | -5.4306  | -1.8064 |
| MAPRE1    | -5.4300  | -1.7543 |
| GOLT1B    | -5.4269  | -2.2209 |
| CASP7     | -5.4263  | -1.6764 |
| PLEKHB2   | -5.4197  | -1.7010 |
| MRFAP1    | -5.3949  | -1.7917 |
| LUC7L3    | -5.3847  | -1.8373 |
| MED17     | -5.3728  | -1.6832 |
| CNBP      | -5.3596  | -1.9113 |
| CXorf38   | -5.3531  | -1.4680 |
| TARDBP    | -5.3435  | -1.6930 |
| TRIM23    | -5.3432  | -1.8633 |
| RBM17     | -5.3215  | -1.6782 |
| CLK4      | -5.3043  | -1.6600 |
| UIMC1     | -5.2935  | -1.5162 |
| MIER1     | -5.2743  | -1.6661 |
| TXNRD1    | -5.2727  | -1.8736 |
| PARL      | -5.2545  | -1.8689 |
| RBM39     | -5.2496  | -1.5650 |
| TXN       | -5.2450  | -2.0488 |
| GLUD1     | -5.2340  | -1.5647 |
| RB1CC1    | -5.2153  | -1.9946 |
| PSMD6     | -5.2118  | -1.5967 |
| PITPNB    | -5.2029  | -1.9705 |
| CYLD      | -5.2003  | -1.7966 |
| RNF10     | -5.1919  | -1.4896 |
| CCDC28A   | -5.1862  | -1.7492 |
| SLU7      | -5.1857  | -1.8368 |
| NAA38     | -5.1801  | -1.6866 |
| ORAOV1    | -5.1798  | -1.4965 |
| PSMD12    | -5.1778  | -1.5936 |
| POU5F1P3  | -5.1741  | -1.9433 |
| HAUS3     | -5.1726  | -2.1190 |
| SPCS3     | -5.1654  | -1.6091 |
| SAFB      | -5.1570  | -1.6475 |
| PPM1B     | -5.1509  | -1.5250 |
| GLRX3     | -5.1140  | -1.6352 |
| BMS1      | -5.1075  | -1.5843 |
| TOPORS    | -5.1064  | -1.6138 |
| PI4K2B    | -5.1058  | -1.8679 |
| FYTTD1    | -5.0998  | -1.7890 |
| ZFAND6    | -5.0933  | -1.7441 |
| ATP6V1H   | -5.0816  | -1.5558 |
| MKRN1     | -5.0812  | -1.5131 |
| HNRNPC    | -5.0778  | -1.5700 |
| KDM1A     | -5.0754  | -1.4685 |
| MARCKS    | -5.0721  | -2.1368 |
| CNOT8     | -5.0697  | -1.5950 |
| UBE2B     | -5.0588  | -1.6136 |
| CREBZF    | -5.0582  | -1.7180 |
| SAFB2     | -5.0479  | -1.7402 |
| KTN1      | -5.0461  | -1.6044 |
| PPP4R2    | -5.0350  | -1.7206 |
| OPA1      | -5.0348  | -1.5936 |
| KDM5A     | -5.0299  | -1.6019 |
| PPP3CC    | -5.0290  | -1.7811 |

| Gene Name | Score(d) | FC     |
|-----------|----------|--------|
| MKL2      | 4.8973   | 1.6813 |
| RAB3A     | 4.8947   | 1.6991 |
| HDAC8     | 4.8890   | 1.6789 |
| DNLZ      | 4.8874   | 1.9373 |
| HAGH      | 4.8774   | 1.5566 |
| BLZF1     | 4.8774   | 1.9892 |
| CYB5A     | 4.8710   | 2.0824 |
| NDUFA2    | 4.8701   | 1.7429 |
| ZDHHC8    | 4.8601   | 1.4431 |
| TAF4      | 4.8422   | 1.2712 |
| DTYMK     | 4.8303   | 1.6624 |
| SF3B5     | 4.8248   | 1.8477 |
| PICK1     | 4.8229   | 1.4924 |
| CHMP2A    | 4.8162   | 1.5064 |
| NIT2      | 4.8159   | 1.9624 |
| PNKP      | 4.8153   | 1.5211 |
| NIF3L1    | 4.7847   | 1.8663 |
| MBD6      | 4.7793   | 1.6033 |
| POLR3K    | 4.7744   | 1.6640 |
| NDUFA6    | 4.7704   | 1.7807 |
| BCS1L     | 4.7676   | 1.5515 |
| SNAP29    | 4.7659   | 1.7111 |
| SCRN3     | 4.7615   | 1.6888 |
| SRCAP     | 4.7602   | 1.6430 |
| MRPL28    | 4.7509   | 1.6433 |
| DGUOK     | 4.7501   | 1.5651 |
| SH3BGR1   | 4.7437   | 1.5677 |
| MYL12B    | 4.7336   | 2.1592 |
| C12orf10  | 4.7271   | 1.6808 |
| CDK4      | 4.7245   | 1.4722 |
| RPAP1     | 4.7144   | 1.5257 |
| ASB16-AS1 | 4.7133   | 1.7412 |
| SELPLG    | 4.7133   | 2.6147 |
| PDK3      | 4.7121   | 1.4636 |
| HTRA2     | 4.7085   | 1.5368 |
| ORAI3     | 4.6952   | 1.4636 |
| STAM2     | 4.6870   | 1.5543 |
| MALSU1    | 4.6863   | 1.7598 |
| PFN1      | 4.6837   | 1.5370 |
| PSMA2     | 4.6754   | 1.9985 |
| STK36     | 4.6614   | 1.6248 |
| RPAIN     | 4.6565   | 1.6984 |
| TMEM258   | 4.6425   | 2.1021 |
| PFDN6     | 4.6340   | 1.5668 |
| APOO      | 4.6204   | 1.8674 |
| KIAA1715  | 4.6202   | 1.5457 |
| TP53TG1   | 4.6198   | 1.5869 |
| ROMO1     | 4.6198   | 1.7767 |
| ERAL1     | 4.6185   | 1.6175 |
| OTUD6B    | 4.6182   | 1.6606 |
| TRMT13    | 4.6166   | 1.8549 |
| HDAC3     | 4.6164   | 1.4222 |
| ATF1      | 4.6126   | 1.4529 |
| EBAG9     | 4.6051   | 1.6779 |
| CCDC53    | 4.6046   | 1.6861 |
| TUBB      | 4.5946   | 1.5492 |
| GDPGP1    | 4.5925   | 1.5417 |
| TXNL4A    | 4.5846   | 1.6752 |
| PSMD10    | 4.5831   | 1.7604 |
| SIGMAR1   | 4.5727   | 2.1137 |
| TMEM33    | 4.5578   | 1.3719 |
| RPP38     | 4.5577   | 1.6305 |

| Gene Name | Score(d) | FC      |
|-----------|----------|---------|
| HBP1      | -5.0288  | -1.7914 |
| RAB22A    | -5.0214  | -1.4676 |
| BIN3      | -5.0186  | -1.6230 |
| YTHDC1    | -5.0155  | -1.6278 |
| DDX3X     | -4.9887  | -2.0073 |
| RPL11     | -4.9847  | -1.7424 |
| PCNP      | -4.9813  | -1.4256 |
| DDX6      | -4.9775  | -1.6565 |
| WBSCR16   | -4.9639  | -1.3674 |
| SLMO2     | -4.9566  | -1.9295 |
| SIRT7     | -4.9500  | -1.6467 |
| ZNF451    | -4.9434  | -1.6280 |
| TAX1BP1   | -4.9422  | -1.4908 |
| BIRC2     | -4.9392  | -1.5386 |
| NGLY1     | -4.9333  | -1.5754 |
| ACBD5     | -4.9275  | -1.7223 |
| RTN4      | -4.9264  | -1.4887 |
| BAG5      | -4.9243  | -1.6044 |
| SAMD8     | -4.9201  | -1.6180 |
| HINT3     | -4.8996  | -1.7258 |
| ARID4A    | -4.8971  | -1.8741 |
| FAM76B    | -4.8945  | -1.3744 |
| RSL24D1   | -4.8757  | -1.7242 |
| CHD2      | -4.8730  | -1.6854 |
| HNRNPA1   | -4.8679  | -1.5694 |
| HNRNPA3P1 | -4.8645  | -1.3667 |
| XPC       | -4.8642  | -1.5902 |
| CHMP2B    | -4.8593  | -1.6474 |
| METAP2    | -4.8446  | -1.5844 |
| WDR82     | -4.8407  | -1.6093 |
| PDCD10    | -4.8397  | -1.5397 |
| ANXA7     | -4.8390  | -1.5821 |
| FBXO11    | -4.8384  | -1.6052 |
| RAD21     | -4.8270  | -1.7280 |
| ZNF410    | -4.8251  | -1.6052 |
| TAF7      | -4.8191  | -1.8926 |
| LRFN4     | -4.8141  | -1.3734 |
| CUL5      | -4.8140  | -1.4308 |
| PPID      | -4.8046  | -1.4950 |
| ARFGAP2   | -4.7986  | -1.5141 |
| STRAP     | -4.7925  | -1.6082 |
| PIK3CA    | -4.7887  | -1.6748 |
| DHX38     | -4.7864  | -1.5011 |
| PJA2      | -4.7823  | -1.5469 |
| NUDT9     | -4.7801  | -1.8656 |
| GMFB      | -4.7781  | -1.5689 |
| CTSL1     | -4.7699  | -2.4912 |
| NDUFA4    | -4.7686  | -1.7943 |
| ATL2      | -4.7641  | -2.0313 |
| MIB1      | -4.7369  | -1.8007 |
| MYNN      | -4.7332  | -1.5083 |
| HSBP1     | -4.7209  | -1.7552 |
| SMARCA5   | -4.7165  | -1.6364 |
| RAB21     | -4.7162  | -1.6423 |
| PRPF4B    | -4.7139  | -1.5104 |
| TCF24     | -4.7126  | -1.4748 |
| OARD1     | -4.7110  | -1.6478 |
| LSM14A    | -4.7030  | -1.5119 |
| EMC6      | -4.7005  | -1.8160 |
| TRAM1     | -4.6987  | -1.5575 |
| APOL2     | -4.6943  | -1.7544 |
| ARMCX3    | -4.6854  | -1.7585 |

| Gene Name | Score(d) | FC     |
|-----------|----------|--------|
| CABLES2   | 4.5529   | 1.4763 |
| MLX       | 4.5440   | 1.5122 |
| AP2A1     | 4.5336   | 1.5652 |
| MAP4K1    | 4.5252   | 1.4991 |
| MRGBP     | 4.5199   | 1.3983 |
| RAB5C     | 4.5183   | 1.7957 |
| ASXL2     | 4.5125   | 1.9191 |
| R3HDM1    | 4.5059   | 1.5788 |
| STK3      | 4.4979   | 1.5247 |
| MYD88     | 4.4914   | 1.8876 |
| ZNF717    | 4.4842   | 1.8085 |
| TBC1D19   | 4.4763   | 1.6893 |
| ARHGEF9   | 4.4762   | 1.5943 |
| ATP6V0E1  | 4.4757   | 1.6175 |
| RNLS      | 4.4729   | 1.3770 |
| TCF12     | 4.4728   | 1.7134 |
| ATF7      | 4.4700   | 1.5130 |
| TULP3     | 4.4688   | 1.7455 |
| C15orf41  | 4.4587   | 1.8601 |
| POGZ      | 4.4575   | 1.6289 |
| ANO6      | 4.4499   | 1.6435 |
| PDE6D     | 4.4485   | 1.4982 |
| FAM217B   | 4.4433   | 1.6728 |
| MRPS18A   | 4.4336   | 1.7542 |
| ZBTB80S   | 4.4250   | 2.3646 |
| ZC3H4     | 4.4222   | 1.2936 |
| CCDC92    | 4.4215   | 1.6799 |
| TUBG2     | 4.4176   | 1.7653 |
| ASB8      | 4.4143   | 1.6252 |
| EXOSC1    | 4.4060   | 1.4852 |
| ZNF384    | 4.4051   | 1.5012 |
| NDUFA12   | 4.4000   | 1.5524 |
| PIP5K1C   | 4.3957   | 1.4412 |
| PSENNEN   | 4.3912   | 1.8941 |
| VMAC      | 4.3908   | 1.3894 |
| RNF26     | 4.3894   | 1.6276 |
| DTD2      | 4.3872   | 1.6407 |
| ZNF138    | 4.3838   | 1.7540 |
| GGA3      | 4.3788   | 1.4538 |
| MED31     | 4.3761   | 1.4883 |
| EXOC7     | 4.3708   | 1.3703 |
| YWHAQ     | 4.3689   | 1.4622 |
| SLC25A40  | 4.3689   | 1.7418 |

| Gene Name | Score(d) | FC      |
|-----------|----------|---------|
| CSNK1A1   | -4.6837  | -1.5345 |
| USP48     | -4.6780  | -1.5535 |
| RNF113A   | -4.6763  | -1.5099 |
| RECQL     | -4.6704  | -1.8005 |
| CBX3      | -4.6694  | -1.4652 |
| PSMC3     | -4.6647  | -1.5788 |
| RAB27A    | -4.6570  | -2.0908 |
| RP9       | -4.6511  | -1.5602 |
| CDC37L1   | -4.6453  | -1.6749 |
| PMS2P3    | -4.6420  | -1.4218 |
| TAPT1     | -4.6368  | -1.5947 |
| PPP1R3B   | -4.6324  | -1.5690 |
| CLP1      | -4.6299  | -1.5687 |
| GSKIP     | -4.6257  | -1.6375 |
| IER5      | -4.6216  | -1.8026 |
| YKT6      | -4.6129  | -1.4592 |
| CCDC12    | -4.6076  | -1.5873 |
| MRPL22    | -4.6062  | -1.6375 |
| EIF5B     | -4.6016  | -1.4147 |
| RALB      | -4.6006  | -1.5959 |
| CCDC126   | -4.5970  | -1.6440 |
| EIF4A2    | -4.5966  | -1.6035 |
| PRKRA     | -4.5909  | -1.4846 |
| ARPC3     | -4.5894  | -1.5133 |
| PDIA6     | -4.5868  | -1.8216 |
| PPP3R1    | -4.5798  | -1.6198 |
| MTMR6     | -4.5731  | -1.6316 |
| CDK5RAP3  | -4.5715  | -1.9961 |
| SUMO1     | -4.5705  | -1.5715 |
| MPP5      | -4.5636  | -1.6337 |
| PNISR     | -4.5613  | -1.4394 |
| RNMT      | -4.5582  | -1.6034 |
| AAGAB     | -4.5578  | -1.7048 |
| EIF3A     | -4.5574  | -1.3204 |
| FBXL3     | -4.5544  | -1.7251 |
| SMIM15    | -4.5433  | -1.6124 |
| TPGS1     | -4.5324  | -1.6815 |
| UBA5      | -4.5251  | -1.5451 |
| NDUFA5    | -4.5235  | -2.1310 |
| BRMS1L    | -4.5220  | -1.9349 |
| SLC36A4   | -4.5197  | -1.5858 |
| SLC35A3   | -4.5124  | -1.7416 |
| GALNT4    | -4.5049  | -1.5147 |
| SLC39A7   | -4.5046  | -1.7145 |
| NCAPH2    | -4.5018  | -1.3248 |
| GRSF1     | -4.4952  | -1.5520 |
| MIR494    | -4.4931  | -1.4970 |
| OSBPL2    | -4.4927  | -1.4020 |
| NAP1L1    | -4.4842  | -1.6252 |
| NANP      | -4.4832  | -1.4779 |
| FGFR10P2  | -4.4759  | -1.6896 |
| C1orf63   | -4.4747  | -1.7449 |
| TFAM      | -4.4714  | -1.8069 |
| OPTN      | -4.4712  | -1.7482 |
| PRPF38B   | -4.4672  | -1.4626 |
| SEC61G    | -4.4595  | -1.4982 |
| NOC2L     | -4.4591  | -1.4791 |
| NFYB      | -4.4590  | -2.1508 |
| RNU6-57   | -4.4546  | -1.3757 |
| GLOD4     | -4.4515  | -2.3187 |
| RIT1      | -4.4493  | -1.6956 |
| MRPS10    | -4.4450  | -1.5753 |

| <b>Gene Name</b> | <b>Score(d)</b> | <b>FC</b> |
|------------------|-----------------|-----------|
| <b>CWF19L1</b>   | -4.4446         | -1.4883   |
| <b>RANBP6</b>    | -4.4445         | -1.5874   |
| <b>EEF1A1</b>    | -4.4412         | -2.2670   |
| <b>MIR149</b>    | -4.4342         | -1.4636   |
| <b>POLR2B</b>    | -4.4309         | -1.5823   |
| <b>SENP2</b>     | -4.4254         | -1.4917   |
| <b>VPS18</b>     | -4.4235         | -1.3367   |
| <b>SART3</b>     | -4.4235         | -1.6957   |
| <b>SLC25A26</b>  | -4.4233         | -1.5259   |
| <b>ZNRF2</b>     | -4.4218         | -1.3841   |
| <b>TSR2</b>      | -4.4202         | -1.6452   |
| <b>RPL6</b>      | -4.4189         | -1.3340   |
| <b>SOD2</b>      | -4.4062         | -1.8681   |
| <b>RAB2A</b>     | -4.3897         | -1.4638   |
| <b>ATG14</b>     | -4.3897         | -1.8524   |
| <b>C1QL1</b>     | -4.3861         | -1.3152   |
| <b>USP33</b>     | -4.3796         | -1.6350   |
| <b>TSPAN3</b>    | -4.3794         | -1.6692   |
| <b>MATR3</b>     | -4.3780         | -1.3836   |
| <b>ZBTB34</b>    | -4.3778         | -1.4426   |
| <b>HIAT1</b>     | -4.3774         | -1.7750   |
| <b>ZNF622</b>    | -4.3748         | -1.6658   |
| <b>TOMM70A</b>   | -4.3715         | -1.5352   |
| <b>LOC400657</b> | -4.3702         | -1.9517   |
| <b>RCN1</b>      | -4.3648         | -2.4491   |
| <b>RBAK</b>      | -4.3603         | -1.5540   |
| <b>FBXO34</b>    | -4.3585         | -1.5315   |
| <b>LMNB1</b>     | -4.3583         | -1.8352   |
| <b>KRTAP19-5</b> | -4.3571         | -1.4593   |
| <b>CRLF3</b>     | -4.3528         | -1.9139   |
| <b>ZUFSP</b>     | -4.3348         | -1.6791   |
| <b>BCLAF1</b>    | -4.3347         | -1.4785   |
| <b>PEX16</b>     | -4.3304         | -1.2884   |
| <b>NAP1L4</b>    | -4.3276         | -1.4298   |
| <b>PNRC1</b>     | -4.3276         | -1.4043   |
| <b>RLIM</b>      | -4.3264         | -1.3939   |
| <b>VEZT</b>      | -4.3141         | -1.4829   |
| <b>MYCBP</b>     | -4.3129         | -1.4099   |
| <b>TBK1</b>      | -4.3120         | -1.4319   |
| <b>FTSJD2</b>    | -4.3117         | -1.4923   |
| <b>ADAM17</b>    | -4.3047         | -1.5215   |

**Supplementary Table S4. List of the significantly enriched pathways for the 518 differentially expressed genes, by Toppgene suite analysis.**

| Category | Source                   | ID                                 | Name                                                           | q-value FDR B&H | Hit Count in Query List | Hit Count in Genome | Hit in Query List                                                                                                                                                                                                                                                                                                                                  |
|----------|--------------------------|------------------------------------|----------------------------------------------------------------|-----------------|-------------------------|---------------------|----------------------------------------------------------------------------------------------------------------------------------------------------------------------------------------------------------------------------------------------------------------------------------------------------------------------------------------------------|
| Pathway  | BioSystems: KEGG         | 125136                             | Spliceosome                                                    | 5.48E-07        | 20                      | 131                 | DDX42,HNRNPA1,HNRNPC,ISY1,SRSF4,SRSF5,SLU7,SYF2,CCDC12,SNW1,LSM8,SF3B5,DHX38,HNRNPM,DHX15,TXNL4A,SF3B2,PRPF38B,SART1,RBM17                                                                                                                                                                                                                         |
| Pathway  | BioSystems: WikiPathways | 198843                             | mRNA processing                                                | 3.51E-06        | 19                      | 136                 | CLK4,HNRNPA1,HNRNPC,HNRNPH1,SRSF4,SRSF5,RBM39,SF3B5,RNMT,DHX38,HNRNPM,SREK1,DHX15,TXNL4A,PRPF4B,CLP1,SF3B2,HNRNPA3P1,RBM17                                                                                                                                                                                                                         |
| Pathway  | BioSystems: REACTOME     | 105952                             | mRNA Splicing - Major Pathway                                  | 1.31E-04        | 15                      | 112                 | HNRNPA1,HNRNPC,HNRNPH1,SRSF4,SRSF5,POLR2B,POLR2F,POLR2H,SF3B5,DHX38,HNRNPM,TXNL4A,CLP1,SF3B2,HNRNPUL1                                                                                                                                                                                                                                              |
| Pathway  | BioSystems: REACTOME     | 105951                             | mRNA Splicing                                                  | 1.31E-04        | 15                      | 112                 | HNRNPA1,HNRNPC,HNRNPH1,SRSF4,SRSF5,POLR2B,POLR2F,POLR2H,SF3B5,DHX38,HNRNPM,TXNL4A,CLP1,SF3B2,HNRNPUL1                                                                                                                                                                                                                                              |
| Pathway  | BioSystems: REACTOME     | 160950                             | Processing of Capped Intron-Containing Pre-mRNA                | 2.36E-03        | 15                      | 143                 | HNRNPA1,HNRNPC,HNRNPH1,SRSF4,SRSF5,POLR2B,POLR2F,POLR2H,SF3B5,DHX38,HNRNPM,TXNL4A,CLP1,SF3B2,HNRNPUL1                                                                                                                                                                                                                                              |
| Pathway  | BioSystems: KEGG         | 83100                              | Huntington's disease                                           | 2.57E-03        | 17                      | 183                 | AP2A1,SDHC,COX5B,POLR2B,COX6A1,POLR2F,POLR2H,SOD2,ATP5G1,NDUFA2,NDUFA4,NDUFA5,NDUFA6,NDUFV3,NDUFA12,TAF4,TFAM                                                                                                                                                                                                                                      |
| Pathway  | BioSystems: REACTOME     | 105983                             | HIV Infection                                                  | 2.68E-03        | 19                      | 225                 | AP2A1,POLR2B,POLR2F,POLR2H,CHMP2B,ATP6V1H,RNMT,PSMA2,PSMC3,PSMC4,PSMD8,PSMD10,PSMD12,CHMP2A,PSMD6,TAF4,TAF6,CUL5,GTAF2A2                                                                                                                                                                                                                           |
| Pathway  | BioSystems: REACTOME     | 106176                             | Regulation of ornithine decarboxylase (ODC)                    | 8.22E-03        | 8                       | 50                  | AZIN1,PSMA2,PSMC3,PSMC4,PSMD8,PSMD10,PSMD12,PSMD6                                                                                                                                                                                                                                                                                                  |
| Pathway  | BioSystems: KEGG         | 83097                              | Alzheimer's disease                                            | 8.22E-03        | 15                      | 168                 | SDHC,COX5B,COX6A1,PPP3CC,PPP3R1,ATP5G1,PSENEN,NDUFA2,NDUFA4,NDUFA5,NDUFA6,NDUFV3,NDUFA12,ADAM17,CASP7                                                                                                                                                                                                                                              |
| Pathway  | BioSystems: REACTOME     | 105796                             | Ubiquitin-dependent degradation of Cyclin D                    | 8.22E-03        | 8                       | 51                  | PSMA2,PSMC3,PSMC4,PSMD8,PSMD10,PSMD12,PSMD6,CDK4                                                                                                                                                                                                                                                                                                   |
| Pathway  | BioSystems: REACTOME     | 105797                             | Ubiquitin-dependent degradation of Cyclin D1                   | 8.22E-03        | 8                       | 51                  | PSMA2,PSMC3,PSMC4,PSMD8,PSMD10,PSMD12,PSMD6,CDK4                                                                                                                                                                                                                                                                                                   |
| Pathway  | BioSystems: KEGG         | 82942                              | Oxidative phosphorylation                                      | 8.22E-03        | 13                      | 133                 | ATP6V1F,SDHC,COX5B,COX6A1,ATP6V1H,ATP5G1,NDUFA2,NDUFA4,NDUFA5,NDUFA6,NDUFV3,NDUFA12,ATP6V0E1                                                                                                                                                                                                                                                       |
| Pathway  | BioSystems: REACTOME     | 477137                             | The citric acid (TCA) cycle and respiratory electron transport | 8.88E-03        | 13                      | 136                 | PKD2,PKD3,SDHC,COX5B,COX6A1,ATP5G1,NDUFA2,NDUFA4,NDUFA5,NDUFA6,NDUFV3,NDUFA12,DLD                                                                                                                                                                                                                                                                  |
| Pathway  | MSigDB C2: BioCarta      | M194                               | Proteasome Complex                                             | 8.88E-03        | 6                       | 28                  | PSMA2,PSMC3,PSMC4,PSMD8,PSMD12,PSMD6                                                                                                                                                                                                                                                                                                               |
| Pathway  | BioSystems: WikiPathways | 198917                             | Eukaryotic Transcription Initiation                            | 9.96E-03        | 7                       | 41                  | POLR2B,POLR2F,POLR2H,POLR3K,TAF6,TAF7,GTAF2A2                                                                                                                                                                                                                                                                                                      |
| Pathway  | BioSystems: REACTOME     | 105937                             | Gene Expression                                                | 9.98E-03        | 54                      | 1188                | CBX3,HNRNPA1,HNRNPC,HNRNPH1,CNOT8,SPCS3,MED17,EXOSC4,SRSF4,SRSF5,POLR2B,POLR2F,POLR2H,PRKRA,MED4,SNW1,ZNF641,EIF5B,SNAPC3,SF3B5,ZNF717,POLR3K,ZNF138,RNMT,PSMA2,DHX38,HNRNPM,PSMC3,PSMC4,PSMD8,PSMD10,PSMD12,DDX6,PSMD6,TXNL4A,TAF4,TAF6,CLP1,MED12,SF3B2,MED31,CARS,EXOSC1,RPSA,HNRNPUL1,TFAM,EEF1A1,GTAF2A2,DCP1B,TRAM1,EIF4A2,SEC61G,RPL6,RPL11 |
| Pathway  | BioSystems: REACTOME     | 106557                             | RNA Polymerase II Transcription                                | 9.98E-03        | 11                      | 104                 | SRSF4,SRSF5,POLR2B,POLR2F,POLR2H,RNMT,DHX38,TAF4,TAF6,CLP1,GTAF2A2                                                                                                                                                                                                                                                                                 |
| Pathway  | BioSystems: REACTOME     | 106017                             | Vif-mediated degradation of APOBEC3G                           | 9.98E-03        | 8                       | 56                  | PSMA2,PSMC3,PSMC4,PSMD8,PSMD10,PSMD12,PSMD6,CUL5                                                                                                                                                                                                                                                                                                   |
| Pathway  | BioSystems: REACTOME     | 105648                             | Apoptosis                                                      | 1.02E-02        | 14                      | 162                 | BIRC2,PPP3CC,PPP3R1,PSMA2,PSMC3,PSMC4,PSMD8,PSMD10,PSMD12,PSMD6,ADAM17,YWHAQ,CASP7,LNMB1                                                                                                                                                                                                                                                           |
| Pathway  | BioSystems: REACTOME     | 105771                             | SCF(Skp2)-mediated degradation of p27/p21                      | 1.02E-02        | 8                       | 57                  | SKP2,PSMA2,PSMC3,PSMC4,PSMD8,PSMD10,PSMD12,PSMD6                                                                                                                                                                                                                                                                                                   |
| Pathway  | GenMAPP                  | MAP00190_Oxidative phosphorylation | MAP00190 Oxidative phosphorylation                             | 1.13E-02        | 7                       | 44                  | ATP6V1F,COX5B,COX6A1,ATP7A,NDUFA5,ATP6V0E1,MPP5                                                                                                                                                                                                                                                                                                    |
| Pathway  | PantherDB                | P00023                             | General transcription regulation                               | 1.24E-02        | 6                       | 32                  | POLR2F,POLR2H,TAF4,TAF6,TAF7,GTAF2A2                                                                                                                                                                                                                                                                                                               |

| Category | Source                   | ID     | Name                                                                                                                | q-value FDR B&H | Hit Count in Query List | Hit Count in Genome | Hit in Query List                                                                                       |
|----------|--------------------------|--------|---------------------------------------------------------------------------------------------------------------------|-----------------|-------------------------|---------------------|---------------------------------------------------------------------------------------------------------|
| Pathway  | MSigDB C2: BioCarta      | M8179  | Rab GTPases Mark Targets In The Endocytotic Machinery                                                               | 1.35E-02        | 4                       | 12                  | RAB1A,RAB2A,RAB3A,RAB27A                                                                                |
| Pathway  | BioSystems: KEGG         | 862188 | Non-alcoholic fatty liver disease (NAFLD)                                                                           | 1.48E-02        | 13                      | 151                 | PIK3CA,SDHC,COX5B,COX6A1,NDUFA2,NDUFA4,NDUFA5,NDUFA6,NDUFV3,NDUFA12,MLX,CASP7,GSK3A                     |
| Pathway  | BioSystems: REACTOME     | 160962 | Respiratory electron transport                                                                                      | 1.56E-02        | 9                       | 79                  | SDHC,COX5B,COX6A1,NDUFA2,NDUFA4,NDUFA5,NDUFA6,NDUFV3,NDUFA12                                            |
| Pathway  | BioSystems: REACTOME     | 105921 | Respiratory electron transport, ATP synthesis by chemiosmotic coupling, and heat production by uncoupling proteins. | 1.56E-02        | 10                      | 97                  | SDHC,COX5B,COX6A1,ATP5G1,NDUFA2,NDUFA4,NDUFA5,NDUFA6,NDUFV3,NDUFA12                                     |
| Pathway  | BioSystems: WikiPathways | 198884 | TNF-alpha/NF-kB Signaling Pathway                                                                                   | 1.56E-02        | 15                      | 196                 | COMMD1,SUMO1,POLR2H,BIRC2,TK1,CYLD,PSMC3,PSMD12,DDX3X,PSMD6,YWHAQ,KTN1,CAPN3,CASP7,RPL6                 |
| Pathway  | BioSystems: REACTOME     | 366161 | Class I MHC mediated antigen processing & presentation                                                              | 1.56E-02        | 18                      | 263                 | UBA5,MKRN1,UBE2B,ASB8,ASB12,SKP2,CTSL,PSMA2,PSMC3,PSMC4,PSMD8,PSMD10,PSMD12,PSMD6,PJA2,CUL5,RNF6,SEC61G |
| Pathway  | BioSystems: REACTOME     | 477126 | Cross-presentation of soluble exogenous antigens (endosomes)                                                        | 1.56E-02        | 7                       | 49                  | PSMA2,PSMC3,PSMC4,PSMD8,PSMD10,PSMD12,PSMD6                                                             |
| Pathway  | BioSystems: REACTOME     | 477122 | Antigen processing-Cross presentation                                                                               | 1.56E-02        | 9                       | 81                  | CTSL,PSMA2,PSMC3,PSMC4,PSMD8,PSMD10,PSMD12,PSMD6,SEC61G                                                 |
| Pathway  | BioSystems: REACTOME     | 366162 | Antigen processing: Ubiquitination & Proteasome degradation                                                         | 1.56E-02        | 16                      | 220                 | UBA5,MKRN1,UBE2B,ASB8,ASB12,SKP2,PSMA2,PSMC3,PSMC4,PSMD8,PSMD10,PSMD12,PSMD6,PJA2,CUL5,RNF6             |
| Pathway  | BioSystems: REACTOME     | 477124 | ER-Phagosome pathway                                                                                                | 1.56E-02        | 8                       | 65                  | PSMA2,PSMC3,PSMC4,PSMD8,PSMD10,PSMD12,PSMD6,SEC61G                                                      |
| Pathway  | BioSystems: WikiPathways | 198786 | Proteasome Degradation                                                                                              | 1.56E-02        | 8                       | 65                  | UBE2B,PSMA2,PSMC3,PSMC4,PSMD8,PSMD10,PSMD12,PSMD6                                                       |
| Pathway  | BioSystems: REACTOME     | 105686 | Regulation of activated PAK-2p34 by proteasome mediated degradation                                                 | 1.58E-02        | 7                       | 50                  | PSMA2,PSMC3,PSMC4,PSMD8,PSMD10,PSMD12,PSMD6                                                             |
| Pathway  | BioSystems: REACTOME     | 105770 | Cyclin E associated events during G1/S transition                                                                   | 1.64E-02        | 8                       | 66                  | SKP2,PSMA2,PSMC3,PSMC4,PSMD8,PSMD10,PSMD12,PSMD6                                                        |
| Pathway  | BioSystems: REACTOME     | 105788 | CDK-mediated phosphorylation and removal of Cdc6                                                                    | 1.69E-02        | 7                       | 51                  | PSMA2,PSMC3,PSMC4,PSMD8,PSMD10,PSMD12,PSMD6                                                             |
| Pathway  | BioSystems: REACTOME     | 105783 | Cyclin A:Cdk2-associated events at S phase entry                                                                    | 1.70E-02        | 8                       | 67                  | SKP2,PSMA2,PSMC3,PSMC4,PSMD8,PSMD10,PSMD12,PSMD6                                                        |
| Pathway  | BioSystems: REACTOME     | 106026 | Vpu mediated degradation of CD4                                                                                     | 1.70E-02        | 7                       | 52                  | PSMA2,PSMC3,PSMC4,PSMD8,PSMD10,PSMD12,PSMD6                                                             |
| Pathway  | BioSystems: REACTOME     | 105821 | Assembly of the pre-replicative complex                                                                             | 1.70E-02        | 8                       | 68                  | MCM2,PSMA2,PSMC3,PSMC4,PSMD8,PSMD10,PSMD12,PSMD6                                                        |
| Pathway  | BioSystems: REACTOME     | 105748 | p53-Independent DNA Damage Response                                                                                 | 1.70E-02        | 7                       | 53                  | PSMA2,PSMC3,PSMC4,PSMD8,PSMD10,PSMD12,PSMD6                                                             |
| Pathway  | BioSystems: REACTOME     | 160939 | Autodegradation of the E3 ubiquitin ligase COP1                                                                     | 1.70E-02        | 7                       | 53                  | PSMA2,PSMC3,PSMC4,PSMD8,PSMD10,PSMD12,PSMD6                                                             |
| Pathway  | BioSystems: REACTOME     | 105747 | p53-Independent G1/S DNA damage checkpoint                                                                          | 1.70E-02        | 7                       | 53                  | PSMA2,PSMC3,PSMC4,PSMD8,PSMD10,PSMD12,PSMD6                                                             |
| Pathway  | BioSystems: REACTOME     | 105749 | Ubiquitin Mediated Degradation of Phosphorylated Cdc25A                                                             | 1.70E-02        | 7                       | 53                  | PSMA2,PSMC3,PSMC4,PSMD8,PSMD10,PSMD12,PSMD6                                                             |
| Pathway  | BioSystems: REACTOME     | 106511 | Degradation of beta-catenin by the destruction complex                                                              | 1.70E-02        | 8                       | 69                  | CSNK1A1,PSMA2,PSMC3,PSMC4,PSMD8,PSMD10,PSMD12,PSMD6                                                     |
| Pathway  | BioSystems: REACTOME     | 105782 | S Phase                                                                                                             | 1.70E-02        | 11                      | 124                 | MCM2,SKP2,PSMA2,PSMC3,PSMC4,PSMD8,PSMD10,PSMD12,PSMD6,RAD21,CDK4                                        |
| Pathway  | BioSystems: REACTOME     | 105744 | Stabilization of p53                                                                                                | 1.70E-02        | 7                       | 54                  | PSMA2,PSMC3,PSMC4,PSMD8,PSMD10,PSMD12,PSMD6                                                             |
| Pathway  | BioSystems: WikiPathways | 198860 | Electron Transport Chain                                                                                            | 1.70E-02        | 10                      | 106                 | SDHC,COX5B,COX6A1,ATP5G1,NDUFA2,NDUFA4,NDUFA5,NDUFA6,NDUFV3,NDUFA12                                     |
| Pathway  | BioSystems: REACTOME     | 105786 | Switching of origins to a post-replicative state                                                                    | 1.70E-02        | 8                       | 71                  | MCM2,PSMA2,PSMC3,PSMC4,PSMD8,PSMD10,PSMD12,PSMD6                                                        |
| Pathway  | BioSystems: REACTOME     | 105787 | Orc1 removal from chromatin                                                                                         | 1.70E-02        | 8                       | 71                  | MCM2,PSMA2,PSMC3,PSMC4,PSMD8,PSMD10,PSMD12,PSMD6                                                        |
| Pathway  | BioSystems: REACTOME     | 105942 | RNA Polymerase II Transcription Initiation And Promoter Clearance                                                   | 1.70E-02        | 6                       | 40                  | POLR2B,POLR2F,POLR2H,TAF4,TAF6,GTF2A2                                                                   |
| Pathway  | BioSystems: REACTOME     | 105999 | RNA Polymerase II HIV Promoter Escape                                                                               | 1.70E-02        | 6                       | 40                  | POLR2B,POLR2F,POLR2H,TAF4,TAF6,GTF2A2                                                                   |
| Pathway  | BioSystems: REACTOME     | 105998 | HIV Transcription Initiation                                                                                        | 1.70E-02        | 6                       | 40                  | POLR2B,POLR2F,POLR2H,TAF4,TAF6,GTF2A2                                                                   |
| Pathway  | BioSystems: REACTOME     | 105944 | RNA Polymerase II Promoter Escape                                                                                   | 1.70E-02        | 6                       | 40                  | POLR2B,POLR2F,POLR2H,TAF4,TAF6,GTF2A2                                                                   |
| Pathway  | BioSystems: REACTOME     | 105941 | RNA Polymerase II Transcription Pre-Initiation And Promoter Opening                                                 | 1.70E-02        | 6                       | 40                  | POLR2B,POLR2F,POLR2H,TAF4,TAF6,GTF2A2                                                                   |
| Pathway  | BioSystems: REACTOME     | 105943 | RNA Polymerase II Transcription Initiation                                                                          | 1.70E-02        | 6                       | 40                  | POLR2B,POLR2F,POLR2H,TAF4,TAF6,GTF2A2                                                                   |
| Pathway  | BioSystems: REACTOME     | 187212 | Destabilization of mRNA by AUF1 (hnRNP D0)                                                                          | 1.70E-02        | 7                       | 55                  | PSMA2,PSMC3,PSMC4,PSMD8,PSMD10,PSMD12,PSMD6                                                             |
| Pathway  | BioSystems: REACTOME     | 105828 | SCF-beta-TrCP mediated degradation of Emi 1                                                                         | 1.70E-02        | 7                       | 55                  | PSMA2,PSMC3,PSMC4,PSMD8,PSMD10,PSMD12,PSMD6                                                             |
| Pathway  | BioSystems: REACTOME     | 187211 | Regulation of mRNA Stability by Proteins that Bind AU-rich Elements                                                 | 1.70E-02        | 9                       | 89                  | EXOSC4,PSMA2,PSMC3,PSMC4,PSMD8,PSMD10,PSMD12,PSMD6,EXOSC1                                               |
| Pathway  | BioSystems: REACTOME     | 105835 | APC/C:Cdh1 mediated degradation of Cdc20 and other APC/C:Cdh1 targeted proteins in late mitosis/early G1            | 1.89E-02        | 8                       | 73                  | SKP2,PSMA2,PSMC3,PSMC4,PSMD8,PSMD10,PSMD12,PSMD6                                                        |
| Pathway  | BioSystems: REACTOME     | 105901 | Removal of licensing factors from origins                                                                           | 1.89E-02        | 8                       | 73                  | MCM2,PSMA2,PSMC3,PSMC4,PSMD8,PSMD10,PSMD12,PSMD6                                                        |

| Category | Source               | ID         | Name                                                  | q-value FDR B&H | Hit Count in Query List | Hit Count in Genome | Hit in Query List                                                                                                                                                                                         |
|----------|----------------------|------------|-------------------------------------------------------|-----------------|-------------------------|---------------------|-----------------------------------------------------------------------------------------------------------------------------------------------------------------------------------------------------------|
| Pathway  | BioSystems: KEGG     | 83098      | Parkinson's disease                                   | 2.11E-02        | 11                      | 131                 | SDHC,COX5B,COX6A1,ATP5G1,NDUFA2,NDUFA4,NDUFA5,NDUFA6,NDUFV3,NDUFA12,HTRA2                                                                                                                                 |
| Pathway  | BioSystems: REACTOME | 105953     | mRNA Splicing - Minor Pathway                         | 2.25E-02        | 6                       | 43                  | POLR2B,POLR2F,POLR2H,SF3B5,TXNL4A,SF3B2                                                                                                                                                                   |
| Pathway  | BioSystems: REACTOME | 105899     | Regulation of DNA replication                         | 2.25E-02        | 8                       | 76                  | MCM2,PSMA2,PSMC3,PSMC4,PSMD8,PSMD10,PSMD12,PSMD6                                                                                                                                                          |
| Pathway  | BioSystems: REACTOME | 105743     | p53-Dependent G1 DNA Damage Response                  | 2.25E-02        | 7                       | 59                  | PSMA2,PSMC3,PSMC4,PSMD8,PSMD10,PSMD12,PSMD6                                                                                                                                                               |
| Pathway  | BioSystems: REACTOME | 105741     | p53-Dependent G1/S DNA damage checkpoint              | 2.25E-02        | 7                       | 59                  | PSMA2,PSMC3,PSMC4,PSMD8,PSMD10,PSMD12,PSMD6                                                                                                                                                               |
| Pathway  | BioSystems: REACTOME | 105824     | CDT1 association with the CDC6:ORC:origin complex     | 2.25E-02        | 7                       | 59                  | PSMA2,PSMC3,PSMC4,PSMD8,PSMD10,PSMD12,PSMD6                                                                                                                                                               |
| Pathway  | BioSystems: KEGG     | 83040      | Proteasome                                            | 2.40E-02        | 6                       | 44                  | PSMA2,PSMC3,PSMC4,PSMD8,PSMD12,PSMD6                                                                                                                                                                      |
| Pathway  | BioSystems: KEGG     | 83036      | Ribosome                                              | 2.42E-02        | 11                      | 135                 | MRPS21,MRPL28,MRPL22,MRPS14,MRPS11,RPSA,MRPS18A,MRPS10,RPL6,RSL24D1,RPL11                                                                                                                                 |
| Pathway  | BioSystems: REACTOME | 105685     | Regulation of Apoptosis                               | 2.63E-02        | 7                       | 61                  | PSMA2,PSMC3,PSMC4,PSMD8,PSMD10,PSMD12,PSMD6                                                                                                                                                               |
| Pathway  | BioSystems: KEGG     | 585562     | Epstein-Barr virus infection                          | 2.77E-02        | 14                      | 203                 | PIK3CA,POLR2B,POLR2F,POLR2H,SKP2,SNW1,TBK1,POLR3K,PSMC3,PSMC4,PSMD8,PSMD12,PSMD6,YWHAQ                                                                                                                    |
| Pathway  | BioSystems: REACTOME | 105740     | G1/S DNA Damage Checkpoints                           | 2.77E-02        | 7                       | 62                  | PSMA2,PSMC3,PSMC4,PSMD8,PSMD10,PSMD12,PSMD6                                                                                                                                                               |
| Pathway  | BioSystems: REACTOME | 105996     | Transcription of the HIV genome                       | 2.77E-02        | 7                       | 62                  | POLR2B,POLR2F,POLR2H,RNMT,TAFA4,TAFA6,GTFA2A                                                                                                                                                              |
| Pathway  | Pathway Ontology     | PW:0000315 | calcineurin signaling                                 | 2.79E-02        | 3                       | 9                   | PPP3CC,PPP3R1,RCAN1                                                                                                                                                                                       |
| Pathway  | BioSystems: KEGG     | 83037      | RNA polymerase                                        | 3.00E-02        | 5                       | 32                  | ZNRD1,POLR2B,POLR2F,POLR2H,POLR3K                                                                                                                                                                         |
| Pathway  | PantherDB            | P00055     | Transcription regulation by bZIP transcription factor | 3.05E-02        | 6                       | 47                  | POLR2F,POLR2H,TAFA4,TAFA6,TAFA7,GTFA2A                                                                                                                                                                    |
| Pathway  | BioSystems: REACTOME | 105836     | Autodegradation of Cdh1 by Cdh1:APC/C                 | 3.17E-02        | 7                       | 64                  | PSMA2,PSMC3,PSMC4,PSMD8,PSMD10,PSMD12,PSMD6                                                                                                                                                               |
| Pathway  | BioSystems: REACTOME | 105812     | M Phase                                               | 3.28E-02        | 15                      | 232                 | LEMD2,BLZF1,MAPRE1,PSMA2,HDAC8,PSMC3,PSMC4,PSMD8,PSMD10,PSMD12,PSMD6,RAB1A,RAB2A,RAD21,LMNB1                                                                                                              |
| Pathway  | BioSystems: REACTOME | 645336     | Synthesis of PIPs at the plasma membrane              | 3.28E-02        | 5                       | 33                  | PI4K2B,PIK3CA,PIP5K1C,MTMR6,MTMR14                                                                                                                                                                        |
| Pathway  | BioSystems: REACTOME | 105898     | DNA Replication Pre-Initiation                        | 3.55E-02        | 8                       | 84                  | MCM2,PSMA2,PSMC3,PSMC4,PSMD8,PSMD10,PSMD12,PSMD6                                                                                                                                                          |
| Pathway  | BioSystems: REACTOME | 105820     | M/G1 Transition                                       | 3.55E-02        | 8                       | 84                  | MCM2,PSMA2,PSMC3,PSMC4,PSMD8,PSMD10,PSMD12,PSMD6                                                                                                                                                          |
| Pathway  | BioSystems: REACTOME | 160993     | Deadenylation-dependent mRNA decay                    | 3.90E-02        | 6                       | 50                  | CNOT8,EXOSC4,DDX6,EXOSC1,DCP1B,EIF4A2                                                                                                                                                                     |
| Pathway  | BioSystems: REACTOME | 160944     | Regulation of mitotic cell cycle                      | 3.94E-02        | 8                       | 86                  | SKP2,PSMA2,PSMC3,PSMC4,PSMD8,PSMD10,PSMD12,PSMD6                                                                                                                                                          |
| Pathway  | BioSystems: REACTOME | 105825     | APC/C-mediated degradation of cell cycle proteins     | 3.94E-02        | 8                       | 86                  | SKP2,PSMA2,PSMC3,PSMC4,PSMD8,PSMD10,PSMD12,PSMD6                                                                                                                                                          |
| Pathway  | BioSystems: REACTOME | 106230     | Metabolism of proteins                                | 3.94E-02        | 32                      | 689                 | TUBB2A,SPCS3,SUMO1,SAMM50,PFN6,EXOSC4,MPI,SLC30A6,B3GNT2,TIMM50,EIF5B,GALNT4,ATP5G1,BCS1L,FBXL3,TOMM70A,NFYB,EXOC7,RAB27A,SENP5,EXOSC1,RPSA,GSK3A,ALG10B,EEF1A1,PDIA6,TRAM1,EIF4A2,SEC61G,RPL6,RPL11,PIGM |
| Pathway  | BioSystems: REACTOME | 576251     | Activation of NF-kappaB in B Cells                    | 3.98E-02        | 7                       | 68                  | PSMA2,PSMC3,PSMC4,PSMD8,PSMD10,PSMD12,PSMD6                                                                                                                                                               |
| Pathway  | BioSystems: REACTOME | 105833     | APC/C:Cdc20 mediated degradation of Securin           | 3.98E-02        | 7                       | 68                  | PSMA2,PSMC3,PSMC4,PSMD8,PSMD10,PSMD12,PSMD6                                                                                                                                                               |
| Pathway  | BioSystems: REACTOME | 645332     | PI Metabolism                                         | 4.02E-02        | 6                       | 51                  | PI4K2B,PIK3CA,PITPNB,PIP5K1C,MTMR6,MTMR14                                                                                                                                                                 |
| Pathway  | BioSystems: REACTOME | 106335     | MicroRNA (miRNA) Biogenesis                           | 4.98E-02        | 4                       | 23                  | POLR2B,POLR2F,POLR2H,PRKRA                                                                                                                                                                                |

**Supplementary Table S5. Selected gene sets significantly up- and down-regulated in MALAT1 quartile IV versus I by GSEA analysis.** Genes contributing to the core enrichment in each gene set are indicated in bold.

| Gene set name                                                             | NES     | Gene set size | Gene list                                                                                                                                                                 |
|---------------------------------------------------------------------------|---------|---------------|---------------------------------------------------------------------------------------------------------------------------------------------------------------------------|
| REACTOME_CASPASE_MEDIATED_CLEAVAGE_OF_CYTOSKELETAL_PROTEINS               | 1.8397  | 11            | <b>CASP7, GSN, CASP3, ADD1, CASP6</b> , SPTAN1, CASP8, VIM, DBNL, MAPT, GAS2                                                                                              |
| BIOPOLYMER_BIOSYNTHETIC_PROCESS                                           | 1.7961  | 10            | <b>EEF1A1, TSFM, TUFM, GYG2</b> , B3GNT8, ALG1, DYRK2, GCK, EEF2K, GYS2                                                                                                   |
| ATP_DEPENDENT_DNA_HELICASE_ACTIVITY                                       | 1.7101  | 10            | <b>RECQL, CHD2, CHD1, DHX9, RUVBL2, XRCC6, CHD4</b> , XRCC5, PIF1, CHD3                                                                                                   |
| SMOOTH_MUSCLE_CONTRACTION_GO_0006939                                      | 1.7078  | 12            | <b>SPHK1, SOD1, NMU</b> , PLCE1, ADRA1A, KCNB2, SMTN, NMUR1, KNG1, CNN1, PROK2, MYH11                                                                                     |
| BOYALT_LIVER_CANCER_SUBCLASS_G6_DN                                        | 1.6905  | 18            | <b>CDH1, RRBP1, SYT17, SDC4, CMTM6, GATA6, AGO2</b> , TRIM15, OSBPL9, LDLR, HES1, INPP1, SLC20A1, LSR, NUP98, TNS1, RFTN1, TNFSF10                                        |
| KOBAYASHI_EGFR_SIGNALING_6HR_UP                                           | 1.5956  | 7             | <b>PDCD4, CCNG2, KLHL24, PELI1</b> , METTL7A, CEP68, AQP3                                                                                                                 |
| DRUG_BINDING                                                              | 1.5939  | 15            | <b>FKBP2, FKBP3, PPID, PPIH, PPIE, PPIG, PPIC</b> , ACR, NKTR, FKBP5, FKBP6, ALB, NFATC1, FKBP4, TOP2A                                                                    |
| KERLEY_RESPONSE_TO_CISPLATIN_DN                                           | 1.5391  | 5             | <b>MYC, HESX1, CYP26A1, HMGCS1, LPIN1</b>                                                                                                                                 |
| ATP_DEPENDENT_HELICASE_ACTIVITY                                           | -1.7369 | 24            | <b>RECQL, DDX3X, DDX21, DDX43, DHX38, CHD2, CHD1, DHX9, DHX8, DDX18, RUVBL2, XRCC6, CHD4, UPF1, DDX25</b> , DDX54, XRCC5, DDX20, PIF1, CHD3, SKIV2L, DDX23, DDX56, EIF4A3 |
| REACTOME_NOREPINEPHRINE_NEUROTRANSMITTER_RELEASE_CYCLE                    | -1.6592 | 12            | <b>VAMP2, SYT1, RAB3A, STXBP1</b> , CPLX1, STX1A, DBH, SNAP25, SLC22A2, MAOA, SLC18A2, RIMS1                                                                              |
| NADERI_BREAST_CANCER_PROGNOSIS_DN                                         | -1.6542 | 16            | <b>CLK4, REXO2, TGFBR3, C1S, DCN, MCEE, SHOX2, SPARCL1, TXNIP, ANXA5, FBLN1</b> , CLDN1, SMOC2, CEBPD, OMD, SSR2                                                          |
| REACTOME_DOPAMINE_NEUROTRANSMITTER_RELEASE_CYCLE                          | -1.6171 | 14            | <b>VAMP2, SYT1, RAB3A, STXBP1</b> , CPLX1, STX1A, DDC, SYN1, SYN3, TH, SNAP25, SYN2, SLC18A2, RIMS1                                                                       |
| DNA_DAMAGE_RESPONSESIGNAL_TRANSDUCTION_RESULTING_IN_INDUCION_OF_APOPTOSIS | -1.5768 | 13            | <b>CIDEB, TP53, BCL3, PCBP4, BRCA1, IFI16, ABL1, PML</b> , DYRK2, SFN, CIDEA, TP73, CHEK2                                                                                 |

**Supplementary Table S6: Sequence-specific SYBR green qRT-PCR primers**

| <b>Primer used for Sybr-green qRT-PCR</b> |                      |
|-------------------------------------------|----------------------|
| <b>Inc-ANGPTL1-3_F</b>                    | GCGTTTCTTCCAAATCACCT |
| <b>Inc-ANGPTL1-3_R</b>                    | GGAACCGGGCTCTAGAAAAA |
| <b>Inc-SEN5-4_F</b>                       | AAGCCAGAGAGCCTTTCCTC |
| <b>Inc-SEN5-4_R</b>                       | ATTTGGCAGCTGTAGGGTTG |
| <b>Inc-LRRC47-1_F</b>                     | CCGAGATGCTCTCGTGACTT |
| <b>Inc-LRRC47-1_R</b>                     | CTCAGCTCTGAAGGCTTGCT |
